# Supplementary material
Source: MDPI journal article supplement (https://www.mdpi.com/2313-4321/5/3/19)
Supplement: s1 [file s1]

## Supplementary Materials to:

# Characterizing the Urban Mine – Simulation-based Optimization of Sampling Approaches for Built-in Batteries in WEEE

Paul Martin Mährlitz <sup>1,\*</sup>, Nathalie Korf <sup>1</sup>, Kristine Sperlich <sup>1,2</sup>, Olivier Münch <sup>1,3</sup>, Matthias Rösslein <sup>4</sup>, Vera Susanne Rotter <sup>1,\*</sup>

<sup>1</sup> Technische Universität Berlin, Chair of Circular Economy and Recycling Technology, Straße des 17. Juni 135, 10623 Berlin, Germany; p.maehlitz@tu-berlin.de (P.M.M.), nathalie.korf@tu-berlin.de (N.K.), vera.rotter@tu-berlin.de (V.S.R.)

<sup>2</sup> Umweltbundesamt, Wörlitzer Platz 1, 06844 Dessau-Roßlau, Germany (current affiliation)

<sup>3</sup> 50Hertz Transmission GmbH, Heidestraße 2, 10557 Berlin, Germany (current affiliation)

<sup>4</sup> Empa, Swiss Federal Laboratories for Materials Science and Technology, Particles-Biology Interactions Laboratory CH-9014 St. Gallen, Switzerland; matthias.roesslein@empa.ch (M.R.)

\* Correspondence: p.maehlitz@tu-berlin.de (P.M.M.); vera.rotter@tu-berlin.de (V.S.R.); Tel.: +49-30-314-22619 (V.S.R.)

This supplement contains:

37 Pages

4 Figures

17 Tables

## Contents

|                                                                                               |    |
|-----------------------------------------------------------------------------------------------|----|
| 1. Sampling data.....                                                                         | 3  |
| 2. R packages and commands .....                                                              | 3  |
| 3. Proportion of WEEE with and without Battery Compartment .....                              | 1  |
| 4. Occurrence of Batteries, Battery Mass, and Mass Share on subKey level .....                | 3  |
| 5. WEEE Mass.....                                                                             | 4  |
| 5.1. Data on UNUkey level.....                                                                | 5  |
| 5.2. Data on UNU subKey level.....                                                            | 6  |
| 6. Battery mass (BM).....                                                                     | 11 |
| 6.1. Data on Battery Mass (BM) for all Batteries (BATT).....                                  | 11 |
| 6.2. Data on Battery Mass (BM) for Batteries differentiated by BATTkey .....                  | 12 |
| 7. Battery Mass Share (BMS).....                                                              | 14 |
| 7.1. Data on Battery Mass Share (BMS) for all Batteries (BATT).....                           | 14 |
| 7.2. Data on Battery Mass Share (BMS) for Batteries differentiated by BATTkey .....           | 16 |
| 7.3. Bootstrap Data on Battery Mass Share (BMS) for all Batteries (BATT).....                 | 20 |
| 7.4. Bootstrap Data on Battery Mass Share (BMS) for Batteries differentiated by BATTkey ..... | 22 |
| 8. WEEE Classification .....                                                                  | 23 |

## Figures

|                                                                                                                                                                                 |   |
|---------------------------------------------------------------------------------------------------------------------------------------------------------------------------------|---|
| <b>Figure S1.</b> Proportion of WEEE devices (UNU subKey) with and without battery compartment (a) and proportion of WEEE in which batteries remained or were missing (b).....  | 1 |
| <b>Figure S2.</b> Mass share of WEEE devices (UNU subKey) with and without battery compartment (a) and mass share of WEEE in which batteries remained or were missing (b) ..... | 2 |
| <b>Figure S3.</b> Occurrence and count of battery types (BATTkeys) in subKeys.....                                                                                              | 3 |
| <b>Figure S4.</b> Mass (a) and mass share (b) of batteries remained in WEEE classified as subKeys and distinguished by their chemical system (BATTkey) .....                    | 4 |

## Tables

|                                                                                                                                                                                       |    |
|---------------------------------------------------------------------------------------------------------------------------------------------------------------------------------------|----|
| <b>Table S1.</b> Number and mass of WEEE and BATT sampled .....                                                                                                                       | 3  |
| <b>Table S2.</b> R packages.....                                                                                                                                                      | 3  |
| <b>Table S3.</b> Number of electronic devices (UNUkey level) with or without battery compartment and share of batteries remained in a product. ....                                   | 3  |
| <b>Table S4.</b> Descriptive statistics for the mass of all WEEE investigated differentiated in UNUkeys....                                                                           | 5  |
| <b>Table S5.</b> Descriptive statistics for the mass of all WEEE investigated differentiated in UNU subKeys .....                                                                     | 6  |
| <b>Table S6.</b> Descriptive statistics for the mass of batteries in WEEE differentiated in UNUkeys .....                                                                             | 11 |
| <b>Table S7.</b> Descriptive statistics for the mass of batteries in WEEE differentiated in UNUkeys and BATTkeys.....                                                                 | 12 |
| <b>Table S8.</b> Descriptive statistics for battery mass share of WEEE differentiated in UNUkeys .....                                                                                | 14 |
| <b>Table S9.</b> Descriptive statistics for battery mass share of WEEE differentiated in subKeys .....                                                                                | 15 |
| <b>Table S10.</b> Descriptive statistics for battery mass share of batteries in WEEE differentiated in UNUkeys and BATTkeys.....                                                      | 16 |
| <b>Table S11.</b> Descriptive statistics for battery mass share of batteries in WEEE differentiated in subKeys and BATTkeys .....                                                     | 18 |
| <b>Table S12.</b> Descriptive statistics for battery mass share of batteries in WEEE differentiated in UNUkeys.....                                                                   | 20 |
| <b>Table S13.</b> Descriptive statistics for battery mass share of batteries in WEEE differentiated in subKeys .....                                                                  | 21 |
| <b>Table S14.</b> Descriptive statistics for battery mass share of batteries in WEEE differentiated in UNUkeys and BATTkeys.....                                                      | 22 |
| <b>Table S15.</b> Descriptive statistics for battery mass share of batteries in WEEE differentiated in subKeys and BATTkeys .....                                                     | 23 |
| <b>Table S16.</b> UNUkey classification and allocation to WEEE categories EU-10 (Annex I to the WEEE Directive 2012/19/EU) and EU-6 (Annex III to the WEEE Directive 2012/19/EU)..... | 23 |
| <b>Table S17.</b> UNUkey and sub-key classification and description of product groups. ....                                                                                           | 25 |

## 1. Sampling data

**Table S1.** Number and mass of WEEE and BATT sampled

| Sampling unit | WEEE  |           | BATT                          |           |
|---------------|-------|-----------|-------------------------------|-----------|
|               | n [-] | mass [kg] | n [-]                         | mass [kg] |
| A             | 819   | 3,951     | 139                           | 10        |
| B             | 429   | 3,200     | 34                            | 1         |
| C             | 832   | 4,010     | 100                           | 6         |
| D             | 802   | 2,652     | 115                           | 5         |
| E             | 962   | 3,403     | 133                           | 5         |
| F             | 489   | 2,402     | not investigated <sup>a</sup> |           |
| G             | 2,124 | 3,689     | 293                           | 34        |
| Grand Total   | 6,457 | 23,306    | 814                           | 61        |

<sup>a</sup> Data were used for WEEE mass calculation only.

## 2. R packages and commands

**Table S2.** R packages.

| Statistical parameter or operation            | Command                                       | R package  |
|-----------------------------------------------|-----------------------------------------------|------------|
| arithmetic mean ( $\bar{x}$ )                 | <i>mean()</i>                                 | base [40]  |
| standard deviation (SD)                       | <i>sd()</i>                                   | base [40]  |
| variation coefficient (VC)                    | <i>sd()/mean()</i>                            | base [40]  |
| 95% confidence interval (2.5%-97.5% quantile) | <i>quantile(x, 0.025), quantile(x, 0.975)</i> | base [40]  |
| median ( $\tilde{x}$ )                        | <i>median()</i>                               | base [40]  |
| median absolute deviation (MAD)               | <i>mad()</i>                                  | base [40]  |
| Log-transformation                            | <i>log10()</i>                                | base [40]  |
| Shapiro-Wilk test                             | <i>shapiro.test()</i>                         | stats [40] |
| Kurtosis                                      | <i>kurtosis()</i>                             | e1071 [39] |
| Skewness                                      | <i>skewness()</i>                             | e1071 [39] |
| bootstrapping                                 | <i>sample(x, n, replace = TRUE)</i>           | base [40]  |

**Table S3.** Number of electronic devices (UNUkey level) with or without battery compartment and share of batteries remained in a product.

| Sum of count |         | Battery compartment |              |                         |                        | total n<br>[-] |
|--------------|---------|---------------------|--------------|-------------------------|------------------------|----------------|
| EU-10        | UNUkey  | without             | with         |                         |                        |                |
|              |         | total<br>[%]        | total<br>[%] | battery<br>remained [%] | battery<br>removed [%] |                |
| -            | unknown | 100                 | 0            | 0                       | 0                      | 6              |
| 00           | 0001    | 100                 | 0            | 0                       | 0                      | 1              |
|              | 0002    | 100                 | 0            | 0                       | 0                      | 1              |
| 01           | 0101    | 100                 | 0            | 0                       | 0                      | 3              |
|              | 0103    | 100                 | 0            | 0                       | 0                      | 2              |
|              | 0105    | 100                 | 0            | 0                       | 0                      | 1              |
|              | 0106    | 100                 | 0            | 0                       | 0                      | 46             |
|              | 0108    | 83                  | 17           | 100                     | 0                      | 6              |
|              | 0111    | 100                 | 0            | 0                       | 0                      | 3              |
|              | 0112    | 100                 | 0            | 0                       | 0                      | 6              |
|              | 0114    | 100                 | 0            | 0                       | 0                      | 16             |

|                 |      |       |       |     |     |       |
|-----------------|------|-------|-------|-----|-----|-------|
| 02              | 0201 | 88    | 13    | 55  | 45  | 336   |
|                 | 0202 | 93    | 7     | 59  | 41  | 324   |
|                 | 0203 | 99    | 1     | 0   | 100 | 247   |
|                 | 0204 | 87    | 13    | 94  | 6   | 237   |
|                 | 0205 | 62    | 38    | 84  | 16  | 150   |
| 03              | 0301 | 89    | 11    | 70  | 30  | 623   |
|                 | 0302 | 22    | 78    | 68  | 32  | 222   |
|                 | 0303 | 17    | 83    | 84  | 16  | 46    |
|                 | 0304 | 99    | 1     | 100 | 0   | 320   |
|                 | 0305 | 58    | 42    | 57  | 43  | 220   |
|                 | 0306 | 4     | 96    | 84  | 16  | 117   |
|                 | 0307 | 94    | 6     | 33  | 67  | 47    |
|                 | 0308 | 93    | 7     | 60  | 40  | 74    |
|                 | 0309 | 93    | 7     | 25  | 75  | 58    |
| 04              | 0401 | 48    | 52    | 61  | 39  | 392   |
|                 | 0402 | 54    | 46    | 39  | 61  | 195   |
|                 | 0403 | 90    | 10    | 43  | 57  | 221   |
|                 | 0404 | 98    | 2     | 40  | 60  | 292   |
|                 | 0405 | 99    | 1     | 0   | 100 | 327   |
|                 | 0406 | 27    | 73    | 74  | 26  | 37    |
|                 | 0407 | 99    | 1     | 67  | 33  | 265   |
|                 | 0408 | 83    | 17    | 50  | 50  | 23    |
| 05              | 0501 | 70    | 30    | 68  | 32  | 82    |
|                 | 0503 | 100   | 0     | 0   | 0   | 8     |
|                 | 0505 | 100   | 0     | 0   | 0   | 4     |
|                 | 0506 | 95    | 5     | 65  | 35  | 467   |
|                 | 0507 | 89    | 11    | 0   | 100 | 9     |
| 06              | 0601 | 83    | 17    | 80  | 20  | 244   |
|                 | 0602 | 94    | 6     | 100 | 0   | 18    |
| 07              | 0701 | 53    | 47    | 78  | 22  | 115   |
|                 | 0702 | 88    | 12    | 71  | 29  | 57    |
| 08              | 0801 | 38    | 62    | 38  | 63  | 13    |
|                 | 0802 | 100   | 0     | 0   | 0   | 4     |
| 09              | 0901 | 49    | 51    | 89  | 11  | 68    |
|                 | 0902 | 100   | 0     | 0   | 0   | 13    |
| 10              | 1001 | 100   | 0     | 0   | 0   | 1     |
|                 | 1002 | 100   | 0     | 0   | 0   | 1     |
| Mean (%)        |      | 82    | 18    | 40  | 34  | -     |
| Median (%)      |      | 93    | 7     | 41  | 35  | -     |
| Grand Total (n) |      | 4,762 | 1,206 | 808 | 398 | 5,968 |

### 3. Proportion of WEEE with and without Battery Compartment

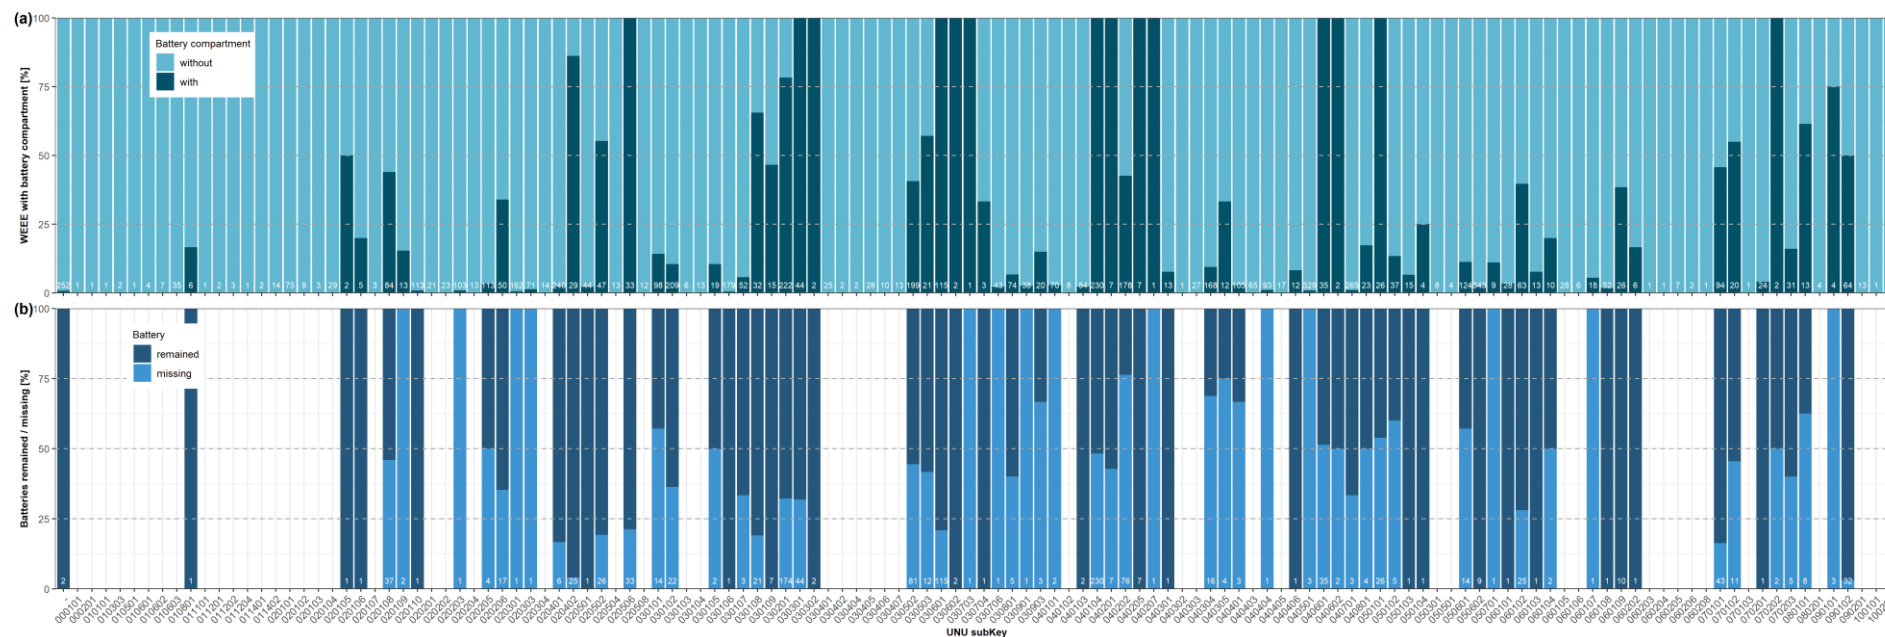

**Figure S1.** Proportion of WEEE devices (UNU subKey) with and without battery compartment (a) and proportion of WEEE in which batteries remained or were missing (b). The total number of appliances is shown in white at the bottom.

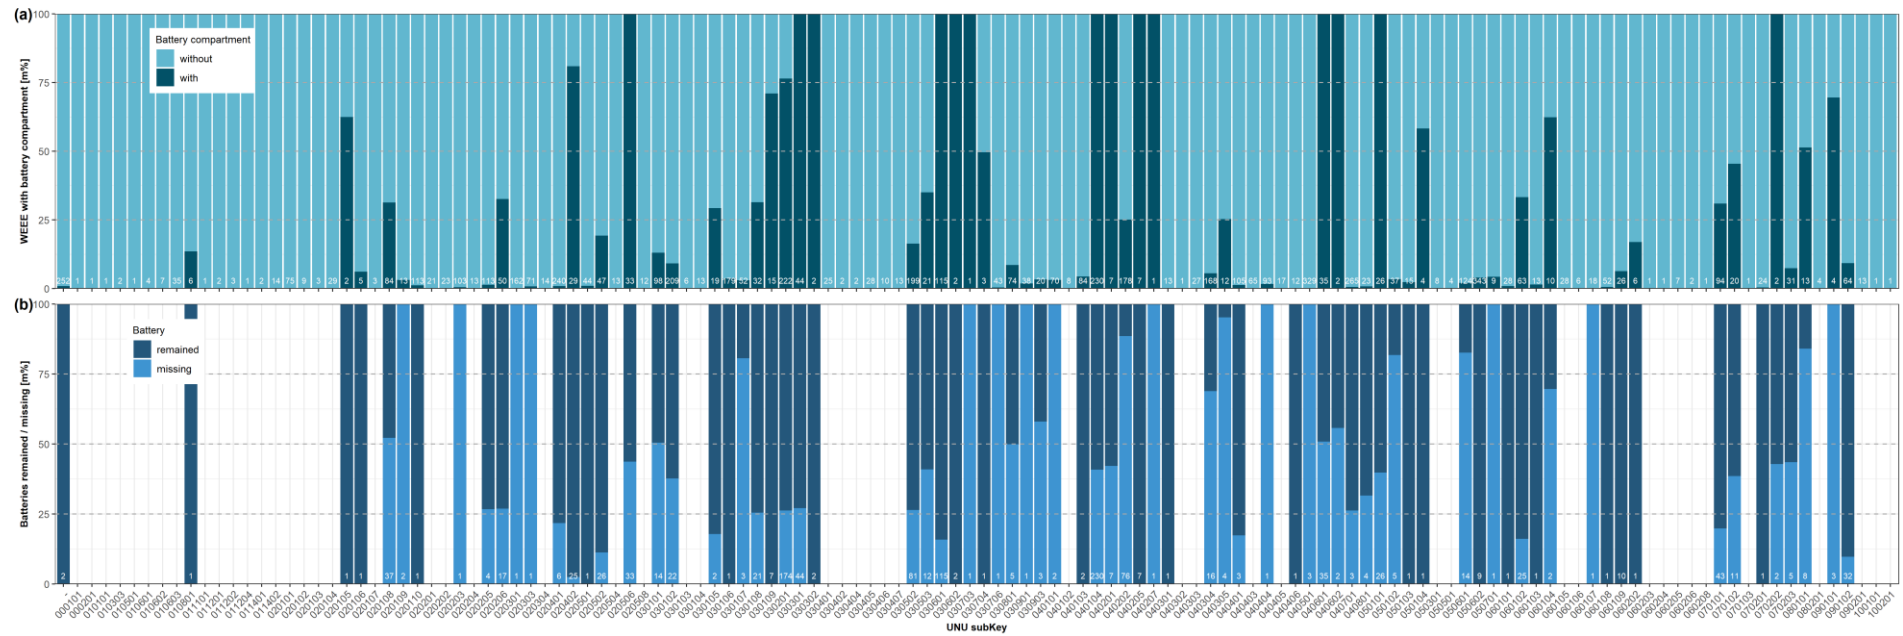

**Figure S2.** Mass share of WEEE devices (UNU subKey) with and without battery compartment (a) and mass share of WEEE in which batteries remained or were missing (b). The total number of appliances in white at the bottom.

9    **4. Occurrence of Batteries, Battery Mass, and Mass Share on subKey level**

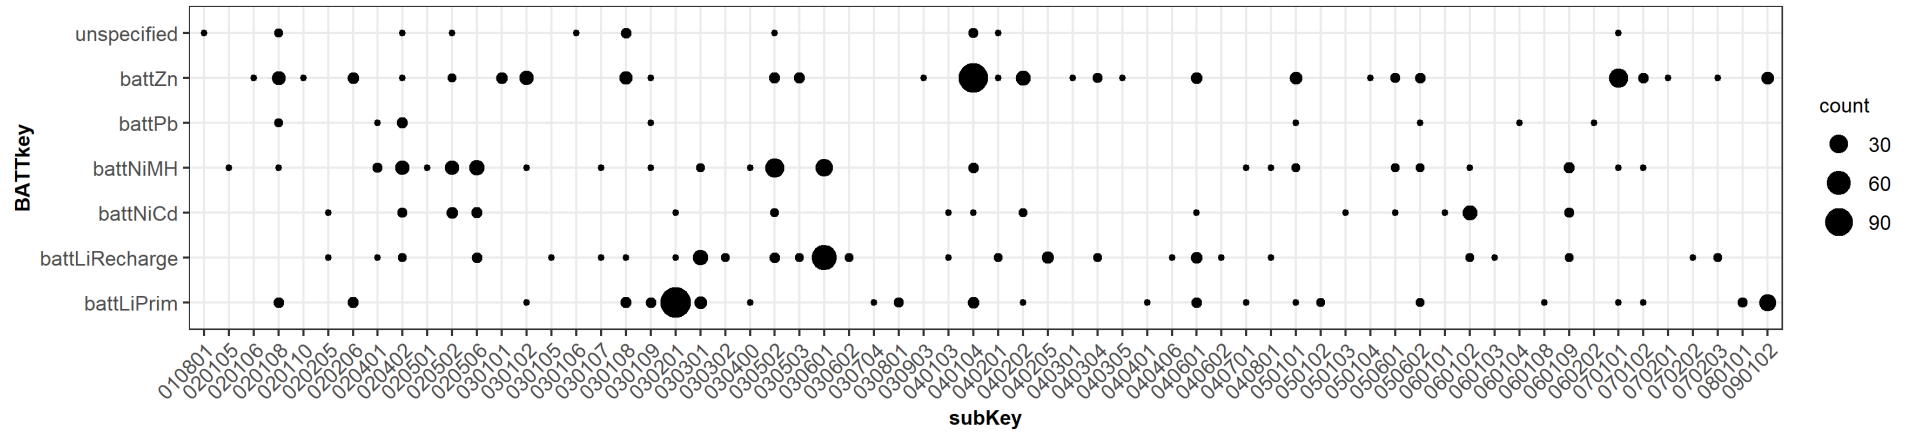

10  
11    **Figure S3.** Occurrence and count of battery types (BATTkeys) in subKeys. The total number of devices considered: 790.

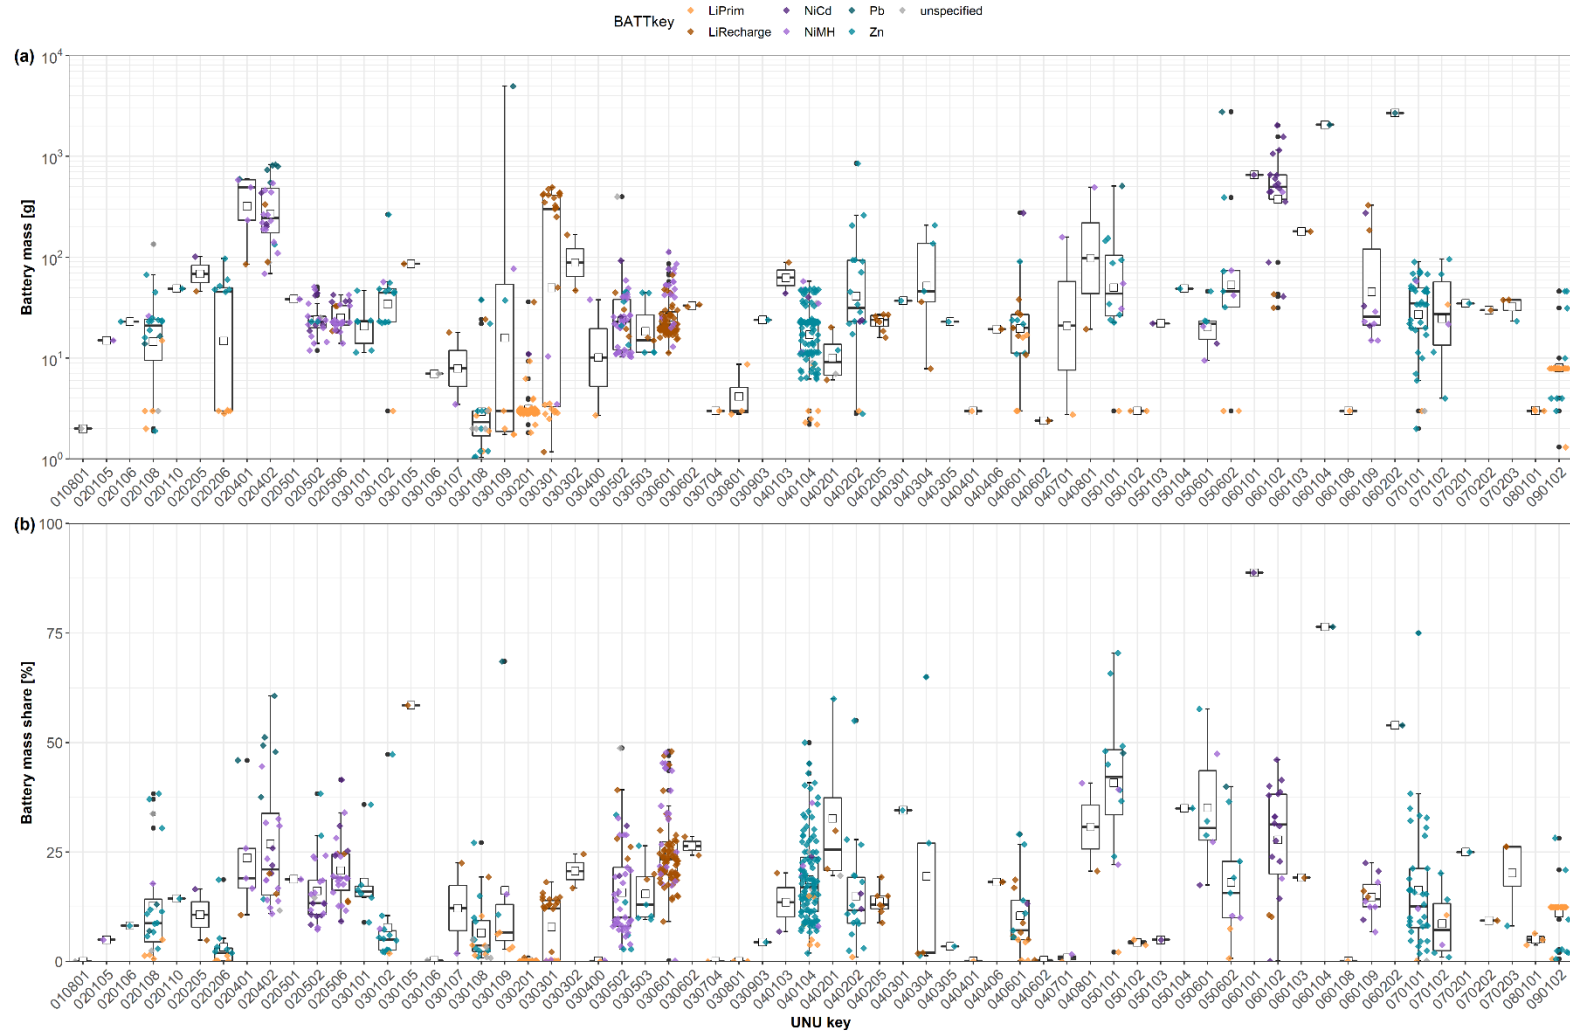

**Figure S4.** Mass (a) and mass share (b) of batteries remained in WEEE classified as subKeys and distinguished by their chemical system (BATTkey). The number of observations (n) is displayed on top of the graph (a). The lower and upper hinges of the boxplots correspond to the first and third quartiles (the 25th and 75th percentiles). The median is drawn as a bold horizontal line; the mean is shown as a square. Upper/lower whisker is the largest/smallest observation less/greater than or equal to upper/lower hinge  $\pm 1.5 \cdot \text{IQR}$ .



## 13 5. WEEE Mass

### 14 5.1. Data on UNUkey level

15 **Table S4** shows the descriptive statistics for the mass of all UNUkeys with more than 15 measured values. In total, the data include over 6000 devices of the  
 16 WEEE Category 1-7, 9, and 10 (Annex I) or respectively the new categories 2-6 (Annex III) of the WEEE Directive [24]. The high SD values compared to the mean  
 17 value, as well as the high values for RSD, skewness, and kurtosis indicate non-normally distributed data. The Shapiro-Wilk test confirms no normal distribution for  
 18 the original and log-transformed data for almost all UNUkeys. Only Microwaves (0114) show low RSD with 40% and normal distribution according to the SW test.  
 19 Lognormality was determined for the mass of food equipment (0202), flat display panel TV's (0408), professional tools (0602), toys (0701), and game consoles (0702).

20 **Table S4.** Descriptive statistics for the mass of all WEEE investigated differentiated in UNUkeys. The table comprises descriptive statistics, the results of the Shapiro-Wilk  
 21 test on the normal distribution (ND) for original and log-transformed (log) data sets, and the results of for minimum samples sizes according to the parametric approach  
 22  $n_{min}(PA)$ .

| UNUkey | n   | $\bar{m}$ | SD    | VC   | $\tilde{m}$ | MAD   | 2.5 <sup>th</sup> | 97.5 <sup>th</sup> | p     | ND  | S    | K     | p <sub>log</sub> | ND <sub>log</sub> | S <sub>log</sub> | K <sub>log</sub> | n <sub>min</sub> (PA) |
|--------|-----|-----------|-------|------|-------------|-------|-------------------|--------------------|-------|-----|------|-------|------------------|-------------------|------------------|------------------|-----------------------|
| 0106   | 99  | 4,470     | 4,310 | 1.00 | 3,660       | 2,430 | 200               | 16,360             | 0     | No  | 2.3  | 6.71  | 0                | No                | -1.04            | 1.83             | 413                   |
| 0114   | 60  | 11,670    | 5,050 | 0.40 | 11,960      | 5,350 | 3,750             | 20,880             | 0.384 | Yes | 0.2  | -0.44 | 0.005            | No                | -0.77            | -0.11            | 2,054                 |
| 0201   | 351 | 1,510     | 2,990 | 2.00 | 480         | 590   | 40                | 8,120              | 0     | No  | 5.53 | 44.72 | 0.011            | No                | 0.15             | -0.58            | 97                    |
| 0202   | 354 | 2,020     | 1,780 | 0.90 | 1,500       | 990   | 350               | 6,750              | 0     | No  | 2.23 | 5.84  | 0.272            | Yes               | 0.08             | -0.02            | 491                   |
| 0203   | 274 | 1,760     | 2,180 | 1.20 | 1,190       | 750   | 380               | 6,160              | 0     | No  | 6.02 | 49.94 | 0                | No                | 0.32             | 2.16             | 250                   |
| 0204   | 286 | 4,700     | 2,240 | 0.50 | 5,000       | 1,690 | 760               | 8,250              | 0     | No  | 0.43 | 1.77  | 0                | No                | -1.28            | 1.02             | 1,687                 |
| 0205   | 153 | 580       | 1,210 | 2.10 | 210         | 150   | 60                | 2,530              | 0     | No  | 6.81 | 58.64 | 0                | No                | 0.81             | 0.75             | 87                    |
| 0301   | 635 | 540       | 700   | 1.30 | 420         | 440   | 20                | 1,900              | 0     | No  | 6.4  | 67.43 | 0                | No                | -0.48            | -0.06            | 232                   |
| 0302   | 250 | 8,900     | 4,450 | 0.50 | 9,500       | 2,970 | 1,330             | 17,390             | 0     | No  | 1.24 | 7.28  | 0                | No                | -1.62            | 2.41             | 1,538                 |
| 0303   | 43  | 2,460     | 860   | 0.40 | 2,560       | 740   | 550               | 3,670              | 0.013 | No  | -0.8 | -0.09 | 0                | No                | -2.01            | 4.03             | 3,116                 |
| 0304   | 354 | 7,170     | 6,320 | 0.90 | 5,530       | 2,920 | 1,500             | 24,250             | 0     | No  | 3.86 | 25.33 | 0                | No                | -1.97            | 18.78            | 495                   |
| 0305   | 227 | 470       | 750   | 1.60 | 280         | 260   | 60                | 1,480              | 0     | No  | 6.99 | 61.29 | 0                | No                | 0.38             | -0.25            | 150                   |
| 0306   | 119 | 110       | 60    | 0.50 | 100         | 30    | 50                | 170                | 0     | No  | 5.89 | 48.42 | 0                | No                | 1.04             | 4.69             | 1,403                 |
| 0307   | 47  | 4,360     | 7,490 | 1.70 | 2,460       | 2,040 | 640               | 12,780             | 0     | No  | 4.87 | 26.5  | 0.037            | No                | 0.38             | 0.71             | 130                   |
| 0308   | 77  | 11,710    | 6,790 | 0.60 | 12,500      | 8,900 | 3,380             | 23,180             | 0     | No  | 0.47 | 0.02  | 0                | No                | -1.7             | 6.01             | 1,143                 |
| 0309   | 58  | 4,810     | 5,410 | 1.10 | 4,000       | 2,420 | 370               | 12,660             | 0     | No  | 4.82 | 28.21 | 0.002            | No                | -0.6             | 1.37             | 303                   |
| 0401   | 393 | 150       | 250   | 1.70 | 100         | 60    | 20                | 590                | 0     | No  | 8.38 | 90.87 | 0                | No                | 0.47             | 2.05             | 140                   |

| UNUkey | n   | $\bar{m}$ | SD     | VC   | $\tilde{m}$ | MAD    | 2.5 <sup>th</sup> | 97.5 <sup>th</sup> | p     | ND | S    | K     | p <sub>log</sub> | ND <sub>log</sub> | S <sub>log</sub> | K <sub>log</sub> | n <sub>min</sub> (PA) |
|--------|-----|-----------|--------|------|-------------|--------|-------------------|--------------------|-------|----|------|-------|------------------|-------------------|------------------|------------------|-----------------------|
| 0402   | 206 | 2,190     | 2,410  | 1.10 | 1,600       | 1,820  | 40                | 8,440              | 0     | No | 2.42 | 8.11  | 0                | No                | -0.7             | -0.07            | 318                   |
| 0403   | 234 | 4,070     | 3,250  | 0.80 | 3,170       | 2,700  | 180               | 11,000             | 0     | No | 2    | 8.29  | 0                | No                | -1.33            | 3.27             | 602                   |
| 0404   | 333 | 2,640     | 2,080  | 0.80 | 2,300       | 1,860  | 90                | 8,220              | 0     | No | 1.72 | 5.17  | 0                | No                | -1.99            | 7.23             | 621                   |
| 0405   | 354 | 3,020     | 3,780  | 1.30 | 1,570       | 1,670  | 120               | 13,320             | 0     | No | 2.52 | 8.05  | 0.034            | No                | -0.11            | -0.48            | 245                   |
| 0406   | 39  | 980       | 2,250  | 2.30 | 220         | 170    | 80                | 8,240              | 0     | No | 3.8  | 14.38 | 0.009            | No                | 0.93             | 0.43             | 73                    |
| 0407   | 266 | 24,560    | 13,600 | 0.60 | 21,000      | 15,570 | 8,000             | 52,410             | 0     | No | 0.92 | 1.34  | 0                | No                | -1.08            | 3.54             | 1,254                 |
| 0408   | 24  | 9,600     | 14,830 | 1.50 | 6,070       | 6,390  | 170               | 43,310             | 0     | No | 3.3  | 11.43 | 0.21             | Yes               | -0.68            | -0.06            | 161                   |
| 0501   | 82  | 560       | 770    | 1.40 | 200         | 210    | 40                | 2,850              | 0     | No | 1.96 | 3.25  | 0.017            | No                | 0.31             | -0.9             | 203                   |
| 0506   | 467 | 850       | 1,230  | 1.40 | 480         | 500    | 40                | 5,030              | 0     | No | 3.6  | 15.65 | 0.02             | No                | -0.1             | -0.25            | 184                   |
| 0601   | 265 | 3,150     | 3,590  | 1.10 | 2,120       | 1,720  | 160               | 14,020             | 0     | No | 2.43 | 6.6   | 0                | No                | -0.49            | 0.11             | 296                   |
| 0602   | 18  | 7,380     | 6,050  | 0.80 | 4,930       | 4,680  | 550               | 18,210             | 0.021 | No | 0.68 | -0.98 | 0.159            | Yes               | -0.62            | -0.45            | 572                   |
| 0701   | 169 | 650       | 740    | 1.10 | 460         | 420    | 50                | 2,720              | 0     | No | 3.08 | 12.2  | 0.304            | Yes               | -0.25            | 0.27             | 294                   |
| 0702   | 57  | 780       | 1,030  | 1.30 | 350         | 310    | 60                | 4,110              | 0     | No | 2.34 | 4.94  | 0.117            | Yes               | 0.31             | -0.57            | 219                   |
| 0901   | 70  | 740       | 1,830  | 2.50 | 160         | 140    | 60                | 5,460              | 0     | No | 4.22 | 18.9  | 0                | No                | 1.11             | 0.49             | 62                    |

n: number of observations,  $\bar{m}$ : mean, SD: standard deviation, VC: coefficient of variation,  $\tilde{m}$ : median, MAD: median absolute deviation, 95% CI: confidence interval [2.5<sup>th</sup> quantile, 97.5<sup>th</sup> quantile], p: p-value of Shapiro-Wilk test (normally distributed if p>0.05), ND: normally distributed data Yes/No, S: skewness, K: kurtosis; log(subscripted): respective values after log-transformation.

## 5.2. Data on UNU subKey level

**Table S5.** Descriptive statistics for the mass of all WEEE investigated differentiated in UNU subKeys. The table comprises descriptive statistics, the results of the Shapiro-Wilk test on the normal distribution (ND) for original and log-transformed (log) data sets, and the results of for minimum samples sizes according to the parametric approach n<sub>min</sub>(PA).

| subKey | n  | $\bar{m}$ | SD    | VC   | $\tilde{m}$ | MAD   | 2.5 <sup>th</sup> | 97.5 <sup>th</sup> | p     | ND  | S     | K     | p <sub>log</sub> | ND <sub>log</sub> | S <sub>log</sub> | K <sub>log</sub> | n <sub>min</sub> (PA) |
|--------|----|-----------|-------|------|-------------|-------|-------------------|--------------------|-------|-----|-------|-------|------------------|-------------------|------------------|------------------|-----------------------|
| 010601 | 12 | 6,895     | 3,957 | 0.57 | 4,990       | 2,165 | 3,180             | 13,966             | 0.008 | No  | 0.87  | -1.02 | 0.115            | Yes               | 0.53             | -1.27            | 125                   |
| 010602 | 15 | 1,781     | 1,793 | 1.01 | 940         | 1,271 | 62                | 5,122              | 0.02  | No  | 0.72  | -1.04 | 0.264            | Yes               | -0.45            | -1.15            | 392                   |
| 010603 | 72 | 4,626     | 4,474 | 0.97 | 3,652       | 2,306 | 609               | 17,096             | 0     | No  | 2.49  | 7.4   | 0.474            | Yes               | -0.11            | -0.19            | 361                   |
| 010801 | 6  | 8,703     | 7,007 | 0.81 | 6,280       | 4,374 | 2,378             | 20,250             | 0.208 | Yes | 0.83  | -0.98 | 0.99             | Yes               | 0.01             | -1.44            | 252                   |
| 011202 | 5  | 5,408     | 2,260 | 0.42 | 5,320       | 1,749 | 2,240             | 7,886              | 0.639 | Yes | -0.41 | -1.46 | 0.127            | Yes               | -0.81            | -1.19            | 68                    |

| subKey | n   | $\bar{m}$ | SD    | VC   | $\tilde{m}$ | MAD   | 2.5 <sup>th</sup> | 97.5 <sup>th</sup> | p     | ND  | S     | K     | p <sub>log</sub> | ND <sub>log</sub> | S <sub>log</sub> | K <sub>log</sub> | n <sub>min</sub> (PA) |
|--------|-----|-----------|-------|------|-------------|-------|-------------------|--------------------|-------|-----|-------|-------|------------------|-------------------|------------------|------------------|-----------------------|
| 011401 | 21  | 8,787     | 5,712 | 0.65 | 6,040       | 3,380 | 3,054             | 20,760             | 0.004 | No  | 0.97  | -0.43 | 0.318            | Yes               | 0.27             | -1.03            | 162                   |
| 011402 | 39  | 13,230    | 3,914 | 0.3  | 13,300      | 3,914 | 6,511             | 19,933             | 0.503 | Yes | 0.46  | 1     | 0.106            | Yes               | -0.8             | 1.45             | 35                    |
| 020101 | 85  | 2,764     | 3,838 | 1.39 | 1,460       | 697   | 741               | 6,240              | 0     | No  | 6.26  | 47.54 | 0                | No                | 0.88             | 0.52             | 742                   |
| 020102 | 14  | 8,735     | 5,540 | 0.63 | 7,190       | 3,736 | 1,012             | 18,850             | 0.243 | Yes | 0.56  | -0.8  | 0.001            | No                | -1.97            | 3.72             | 152                   |
| 020104 | 29  | 2,106     | 1,295 | 0.61 | 2,220       | 1,067 | 284               | 4,550              | 0.001 | No  | 1.6   | 4.59  | 0.002            | No                | -1.24            | 2                | 143                   |
| 020106 | 5   | 900       | 1,536 | 1.71 | 280         | 208   | 86                | 3,312              | 0.001 | No  | 1.06  | -0.94 | 0.385            | Yes               | 0.65             | -1.36            | 1,123                 |
| 020108 | 84  | 435       | 592   | 1.36 | 279         | 265   | 40                | 1,555              | 0     | No  | 4.79  | 30.27 | 0.564            | Yes               | -0.04            | -0.31            | 711                   |
| 020109 | 13  | 498       | 732   | 1.47 | 231         | 167   | 61                | 2,276              | 0     | No  | 2.05  | 3.06  | 0.408            | Yes               | 0.6              | -0.26            | 830                   |
| 020110 | 113 | 256       | 237   | 0.93 | 180         | 178   | 29                | 856                | 0     | No  | 2.18  | 7.08  | 0.033            | No                | -0.25            | -0.63            | 332                   |
| 020201 | 38  | 3,662     | 3,197 | 0.87 | 2,750       | 2,535 | 425               | 10,522             | 0     | No  | 1.01  | -0.33 | 0.118            | Yes               | -0.35            | -0.74            | 291                   |
| 020202 | 23  | 3,273     | 966   | 0.3  | 3,460       | 1,127 | 1,800             | 4,736              | 0.136 | Yes | -0.09 | -1.38 | 0.053            | Yes               | -0.4             | -1.26            | 35                    |
| 020203 | 107 | 2,055     | 1,600 | 0.78 | 1,520       | 504   | 472               | 6,500              | 0     | No  | 1.99  | 3.03  | 0                | No                | 0.54             | 0.66             | 234                   |
| 020204 | 13  | 3,061     | 1,663 | 0.54 | 2,600       | 1,666 | 1,216             | 6,286              | 0.19  | Yes | 0.74  | -0.65 | 0.893            | Yes               | 0.1              | -1.33            | 112                   |
| 020205 | 117 | 1,366     | 1,101 | 0.81 | 980         | 474   | 435               | 4,794              | 0     | No  | 2.2   | 4.95  | 0.001            | No                | 0.58             | 0.3              | 252                   |
| 020206 | 55  | 1,387     | 994   | 0.72 | 1,342       | 976   | 190               | 3,285              | 0     | No  | 1.55  | 4.38  | 0.031            | No                | -0.47            | -0.56            | 199                   |
| 020301 | 175 | 2,126     | 2,393 | 1.13 | 1,570       | 764   | 607               | 7,929              | 0     | No  | 5.89  | 46.1  | 0                | No                | -0.02            | 5.03             | 491                   |
| 020302 | 9   | 2,487     | 1,541 | 0.62 | 2,320       | 1,898 | 496               | 4,768              | 0.679 | Yes | 0.21  | -1.54 | 0.33             | Yes               | -0.73            | -0.69            | 148                   |
| 020303 | 76  | 976       | 1,579 | 1.62 | 720         | 267   | 363               | 1,690              | 0     | No  | 7.46  | 58.08 | 0                | No                | 1.94             | 10.56            | 1,008                 |
| 020304 | 14  | 901       | 740   | 0.82 | 620         | 231   | 326               | 2,697              | 0     | No  | 1.93  | 2.85  | 0.218            | Yes               | 0.86             | 0.09             | 258                   |
| 020401 | 231 | 5,127     | 2,069 | 0.4  | 5,210       | 1,794 | 880               | 9,250              | 0     | No  | 0.68  | 3.14  | 0                | No                | -1.72            | 3.94             | 61                    |
| 020402 | 55  | 2,895     | 2,051 | 0.71 | 1,720       | 1,450 | 633               | 6,299              | 0     | No  | 0.56  | -1.06 | 0.001            | No                | -0.01            | -1.49            | 194                   |
| 020501 | 45  | 462       | 347   | 0.75 | 385         | 200   | 142               | 1,682              | 0     | No  | 3.08  | 10.49 | 0.018            | No                | 0.5              | 1.3              | 216                   |
| 020502 | 47  | 477       | 1,799 | 3.77 | 159         | 60    | 42                | 1,741              | 0     | No  | 6.2   | 38.07 | 0                | No                | 1.83             | 6.95             | 5,460                 |
| 020504 | 13  | 1,740     | 1,165 | 0.67 | 1,400       | 1,097 | 550               | 4,091              | 0.049 | No  | 1.06  | 0.51  | 0.623            | Yes               | 0.05             | -1.33            | 172                   |
| 020506 | 33  | 182       | 217   | 1.19 | 120         | 25    | 83                | 895                | 0     | No  | 3.57  | 12.02 | 0                | No                | 2.53             | 6.41             | 544                   |
| 020508 | 13  | 755       | 686   | 0.91 | 560         | 563   | 145               | 1,930              | 0.011 | No  | 0.64  | -1.36 | 0.072            | Yes               | 0.15             | -1.78            | 318                   |
| 030101 | 98  | 120       | 124   | 1.03 | 108         | 25    | 48                | 186                | 0     | No  | 8.72  | 79.88 | 0                | No                | 2.09             | 14.85            | 408                   |
| 030102 | 209 | 903       | 566   | 0.63 | 820         | 267   | 335               | 2,288              | 0     | No  | 3.91  | 19.15 | 0                | No                | -0.68            | 7.98             | 152                   |

| subKey | n   | $\bar{m}$ | SD    | VC   | $\tilde{m}$ | MAD   | 2.5 <sup>th</sup> | 97.5 <sup>th</sup> | p     | ND  | S     | K     | p <sub>log</sub> | ND <sub>log</sub> | S <sub>log</sub> | K <sub>log</sub> | n <sub>min</sub> (PA) |
|--------|-----|-----------|-------|------|-------------|-------|-------------------|--------------------|-------|-----|-------|-------|------------------|-------------------|------------------|------------------|-----------------------|
| 030103 | 6   | 716       | 132   | 0.18 | 740         | 38    | 507               | 869                | 0.23  | Yes | -0.58 | -0.85 | 0.093            | Yes               | -0.85            | -0.67            | 12                    |
| 030104 | 13  | 492       | 254   | 0.52 | 480         | 178   | 158               | 992                | 0.575 | Yes | 0.68  | -0.14 | 0.89             | Yes               | -0.41            | -0.75            | 104                   |
| 030105 | 19  | 32        | 32    | 0.99 | 20          | 13    | 9                 | 110                | 0     | No  | 2.46  | 6.05  | 0.099            | Yes               | 0.72             | 0.08             | 377                   |
| 030106 | 188 | 384       | 276   | 0.72 | 342         | 200   | 50                | 979                | 0     | No  | 2.98  | 17.28 | 0                | No                | -1.07            | 2.63             | 199                   |
| 030107 | 52  | 856       | 1,498 | 1.75 | 310         | 326   | 60                | 2,879              | 0     | No  | 4.44  | 23.89 | 0.015            | No                | 0.37             | -0.94            | 1,176                 |
| 030108 | 35  | 171       | 283   | 1.66 | 85          | 67    | 20                | 1,064              | 0     | No  | 3.3   | 10.88 | 0.093            | Yes               | 0.64             | 0.12             | 1,059                 |
| 030109 | 15  | 779       | 1,822 | 2.34 | 106         | 118   | 27                | 5,063              | 0     | No  | 2.94  | 7.56  | 0.231            | Yes               | 0.55             | -0.78            | 2,104                 |
| 030201 | 250 | 8,897     | 4,446 | 0.5  | 9,500       | 2,965 | 1,333             | 17,388             | 0     | No  | 1.24  | 7.28  | 0                | No                | -1.62            | 2.41             | 96                    |
| 030301 | 41  | 2,552     | 757   | 0.3  | 2,614       | 673   | 920               | 3,680              | 0.065 | Yes | -0.71 | -0.01 | 0                | No                | -1.8             | 3.5              | 35                    |
| 030400 | 240 | 8,068     | 6,800 | 0.84 | 6,460       | 2,906 | 1,920             | 24,500             | 0     | No  | 3.93  | 25.02 | 0                | No                | -3.07            | 30.04            | 271                   |
| 030401 | 49  | 5,679     | 3,073 | 0.54 | 5,096       | 1,548 | 1,420             | 11,440             | 0     | No  | 2.2   | 7.74  | 0.01             | No                | -0.65            | 2.04             | 112                   |
| 030404 | 11  | 7,817     | 7,376 | 0.94 | 4,480       | 4,982 | 1,146             | 22,410             | 0.047 | No  | 0.95  | -0.37 | 0.674            | Yes               | -0.03            | -1.54            | 339                   |
| 030405 | 28  | 3,475     | 4,340 | 1.25 | 2,560       | 697   | 1,149             | 11,851             | 0     | No  | 4.33  | 18.62 | 0                | No                | 0.72             | 5.31             | 600                   |
| 030406 | 11  | 4,860     | 2,092 | 0.43 | 4,500       | 2,224 | 1,585             | 8,165              | 0.711 | Yes | -0.01 | -1    | 0.09             | Yes               | -0.81            | -0.58            | 71                    |
| 030407 | 13  | 3,416     | 1,406 | 0.41 | 2,890       | 756   | 2,120             | 6,568              | 0.007 | No  | 1.38  | 0.8   | 0.178            | Yes               | 0.87             | -0.28            | 65                    |
| 030502 | 206 | 489       | 778   | 1.59 | 300         | 286   | 69                | 1,560              | 0     | No  | 6.78  | 56.94 | 0                | No                | 0.35             | -0.22            | 971                   |
| 030503 | 21  | 254       | 273   | 1.08 | 154         | 110   | 60                | 875                | 0     | No  | 2.3   | 5.61  | 0.125            | Yes               | 0.57             | -0.75            | 448                   |
| 030601 | 117 | 106       | 56    | 0.53 | 100         | 30    | 52                | 172                | 0     | No  | 5.88  | 48    | 0                | No                | 1.08             | 4.74             | 108                   |
| 030706 | 43  | 3,061     | 2,689 | 0.88 | 2,189       | 1,773 | 771               | 11,350             | 0     | No  | 1.96  | 4.16  | 0.012            | No                | 0.36             | -0.91            | 297                   |
| 030801 | 77  | 11,711    | 6,790 | 0.58 | 12,500      | 8,896 | 3,382             | 23,182             | 0     | No  | 0.47  | 0.02  | 0                | No                | -1.7             | 6.01             | 129                   |
| 030901 | 38  | 6,321     | 6,141 | 0.97 | 4,750       | 1,483 | 2,188             | 16,875             | 0     | No  | 4.36  | 20.96 | 0                | No                | -0.93            | 6.89             | 361                   |
| 030903 | 20  | 1,928     | 1,006 | 0.52 | 2,120       | 915   | 372               | 3,835              | 0.412 | Yes | 0.23  | -0.5  | 0.018            | No                | -0.9             | -0.26            | 104                   |
| 040101 | 70  | 121       | 110   | 0.91 | 82          | 93    | 13                | 406                | 0     | No  | 1.24  | 1.25  | 0.003            | No                | -0.18            | -1.2             | 318                   |
| 040102 | 8   | 193       | 131   | 0.68 | 184         | 187   | 24                | 366                | 0.583 | Yes | 0.02  | -1.72 | 0.136            | Yes               | -0.72            | -1.19            | 178                   |
| 040103 | 84  | 293       | 481   | 1.64 | 130         | 103   | 21                | 1,073              | 0     | No  | 4.3   | 21.6  | 0.036            | No                | 0.48             | -0.1             | 1,033                 |
| 040104 | 231 | 104       | 79    | 0.76 | 95          | 37    | 40                | 195                | 0     | No  | 7.83  | 79.42 | 0                | No                | 0.3              | 4.89             | 222                   |
| 040201 | 7   | 38        | 16    | 0.43 | 36          | 15    | 21                | 65                 | 0.509 | Yes | 0.7   | -0.9  | 0.991            | Yes               | 0.2              | -1.39            | 71                    |
| 040202 | 178 | 2,351     | 2,480 | 1.05 | 1,842       | 1,868 | 146               | 9,075              | 0     | No  | 2.41  | 7.77  | 0                | No                | -0.51            | -0.43            | 424                   |

| subKey | n   | $\bar{m}$ | SD     | VC   | $\tilde{m}$ | MAD    | 2.5 <sup>th</sup> | 97.5 <sup>th</sup> | p     | ND  | S     | K     | p <sub>log</sub> | ND <sub>log</sub> | S <sub>log</sub> | K <sub>log</sub> | n <sub>min</sub> (PA) |
|--------|-----|-----------|--------|------|-------------|--------|-------------------|--------------------|-------|-----|-------|-------|------------------|-------------------|------------------|------------------|-----------------------|
| 040205 | 7   | 172       | 19     | 0.11 | 180         | 26     | 143               | 197                | 0.705 | Yes | -0.21 | -1.28 | 0.61             | Yes               | -0.37            | -1.2             | 5                     |
| 040207 | 14  | 2,264     | 1,694  | 0.75 | 1,890       | 1,957  | 338               | 5,123              | 0.197 | Yes | 0.45  | -1.31 | 0.472            | Yes               | -0.42            | -1.13            | 216                   |
| 040301 | 16  | 4,406     | 3,331  | 0.76 | 4,370       | 3,758  | 135               | 10,188             | 0.415 | Yes | 0.3   | -0.94 | 0.007            | No                | -0.97            | -0.59            | 222                   |
| 040303 | 28  | 1,359     | 1,007  | 0.74 | 1,206       | 273    | 151               | 3,416              | 0     | No  | 3.11  | 11.7  | 0                | No                | -1.27            | 3.34             | 210                   |
| 040304 | 176 | 4,417     | 2,892  | 0.65 | 3,560       | 2,392  | 373               | 11,000             | 0     | No  | 1.02  | 1     | 0                | No                | -1.83            | 7.22             | 162                   |
| 040305 | 13  | 4,919     | 6,876  | 1.4  | 3,000       | 3,173  | 268               | 21,062             | 0     | No  | 2.15  | 3.87  | 0.887            | Yes               | -0.48            | -0.05            | 753                   |
| 040401 | 140 | 2,974     | 1,830  | 0.62 | 2,643       | 1,125  | 532               | 7,308              | 0     | No  | 2.66  | 11.85 | 0                | No                | -0.91            | 2.56             | 148                   |
| 040403 | 65  | 4,440     | 1,797  | 0.4  | 4,000       | 979    | 2,060             | 8,780              | 0     | No  | 1.43  | 2.25  | 0.032            | No                | 0.03             | 1.2              | 61                    |
| 040404 | 99  | 1,188     | 856    | 0.72 | 1,007       | 707    | 213               | 3,207              | 0     | No  | 1.74  | 5.33  | 0                | No                | -3.15            | 15.06            | 199                   |
| 040405 | 17  | 335       | 267    | 0.8  | 358         | 403    | 40                | 734                | 0.02  | No  | 0.19  | -1.65 | 0.007            | No                | -0.33            | -1.73            | 246                   |
| 040406 | 12  | 4,249     | 3,446  | 0.81 | 4,230       | 2,261  | 73                | 10,987             | 0.171 | Yes | 0.79  | 0.25  | 0.006            | No                | -1.07            | -0.45            | 252                   |
| 040501 | 354 | 3,017     | 3,779  | 1.25 | 1,574       | 1,670  | 118               | 13,324             | 0     | No  | 2.52  | 8.05  | 0.034            | No                | -0.11            | -0.48            | 600                   |
| 040601 | 37  | 983       | 2,308  | 2.35 | 200         | 149    | 76                | 8,436              | 0     | No  | 3.69  | 13.41 | 0.003            | No                | 1.04             | 0.58             | 2,122                 |
| 040701 | 266 | 24,563    | 13,598 | 0.55 | 21,000      | 15,567 | 8,000             | 52,412             | 0     | No  | 0.92  | 1.34  | 0                | No                | -1.08            | 3.54             | 116                   |
| 040801 | 23  | 9,831     | 15,119 | 1.54 | 6,500       | 7,532  | 166               | 44,625             | 0     | No  | 3.2   | 10.74 | 0.217            | Yes               | -0.67            | -0.19            | 911                   |
| 050101 | 26  | 172       | 233    | 1.36 | 87          | 65     | 34                | 882                | 0     | No  | 2.78  | 7.15  | 0.098            | Yes               | 0.83             | 0.51             | 711                   |
| 050102 | 37  | 594       | 649    | 1.09 | 268         | 230    | 78                | 1,962              | 0     | No  | 1.47  | 1.55  | 0.045            | No                | 0.33             | -1.24            | 456                   |
| 050103 | 15  | 1,274     | 1,153  | 0.9  | 960         | 1,186  | 68                | 3,280              | 0.047 | No  | 0.58  | -1.28 | 0.295            | Yes               | -0.6             | -0.75            | 311                   |
| 050104 | 4   | 60        | 54     | 0.9  | 40          | 15     | 22                | 132                | 0.062 | Yes | 0.68  | -1.73 | 0.467            | Yes               | 0.37             | -1.83            | 311                   |
| 050301 | 8   | 1,680     | 281    | 0.17 | 1,520       | 139    | 1,402             | 2,037              | 0.015 | No  | 0.37  | -1.99 | 0.021            | No                | 0.34             | -1.98            | 11                    |
| 050501 | 4   | 455       | 391    | 0.86 | 430         | 460    | 103               | 850                | 0.177 | Yes | 0.04  | -2.39 | 0.188            | Yes               | -0.02            | -2.39            | 284                   |
| 050601 | 124 | 887       | 1,104  | 1.25 | 664         | 715    | 42                | 3,151              | 0     | No  | 3.66  | 19.1  | 0.005            | No                | -0.5             | -0.21            | 600                   |
| 050602 | 343 | 841       | 1,275  | 1.52 | 420         | 445    | 40                | 5,275              | 0     | No  | 3.56  | 14.61 | 0.038            | No                | 0.07             | -0.23            | 888                   |
| 050701 | 9   | 2,140     | 2,430  | 1.14 | 1,403       | 858    | 710               | 7,210              | 0     | No  | 1.93  | 2.25  | 0.08             | Yes               | 1.14             | 0.44             | 499                   |
| 060101 | 28  | 2,872     | 1,788  | 0.62 | 2,370       | 1,197  | 740               | 6,368              | 0.003 | No  | 0.84  | -0.64 | 0.323            | Yes               | -0.04            | -0.89            | 148                   |
| 060102 | 70  | 2,145     | 1,450  | 0.68 | 1,680       | 860    | 294               | 5,711              | 0     | No  | 1.45  | 1.58  | 0.003            | No                | -0.52            | 0.82             | 178                   |
| 060103 | 13  | 4,877     | 4,442  | 0.91 | 2,440       | 1,275  | 1,132             | 12,700             | 0.003 | No  | 0.84  | -1.1  | 0.088            | Yes               | 0.37             | -1.5             | 318                   |
| 060104 | 11  | 1,825     | 2,238  | 1.23 | 460         | 563    | 110               | 6,095              | 0.002 | No  | 1.03  | -0.63 | 0.541            | Yes               | 0.05             | -1.43            | 581                   |

| subKey | n   | $\bar{m}$ | SD     | VC   | $\tilde{m}$ | MAD   | 2.5 <sup>th</sup> | 97.5 <sup>th</sup> | p     | ND  | S     | K     | p <sub>log</sub> | ND <sub>log</sub> | S <sub>log</sub> | K <sub>log</sub> | n <sub>min</sub> (PA) |
|--------|-----|-----------|--------|------|-------------|-------|-------------------|--------------------|-------|-----|-------|-------|------------------|-------------------|------------------|------------------|-----------------------|
| 060105 | 34  | 6,255     | 6,201  | 0.99 | 3,930       | 3,558 | 262               | 20,728             | 0     | No  | 1.09  | -0.1  | 0.111            | Yes               | -0.49            | -0.56            | 377                   |
| 060106 | 6   | 1,253     | 1,543  | 1.23 | 855         | 838   | 76                | 3,875              | 0.038 | No  | 1.06  | -0.56 | 0.902            | Yes               | -0.25            | -1.57            | 581                   |
| 060107 | 22  | 3,070     | 1,457  | 0.47 | 3,000       | 1,483 | 683               | 5,437              | 0.542 | Yes | 0.09  | -0.86 | 0                | No                | -2.16            | 5.58             | 85                    |
| 060108 | 53  | 2,294     | 2,825  | 1.23 | 1,700       | 1,828 | 190               | 11,000             | 0     | No  | 2.06  | 3.72  | 0.032            | No                | -0.02            | -1.03            | 581                   |
| 060109 | 28  | 4,002     | 4,744  | 1.19 | 2,110       | 2,713 | 114               | 14,203             | 0     | No  | 1.12  | -0.29 | 0.019            | No                | -0.3             | -1.29            | 544                   |
| 060202 | 6   | 4,898     | 3,936  | 0.8  | 4,930       | 5,434 | 486               | 10,100             | 0.535 | Yes | 0.09  | -1.81 | 0.117            | Yes               | -0.44            | -1.91            | 246                   |
| 060205 | 7   | 8,536     | 6,083  | 0.71 | 5,060       | 3,106 | 3,006             | 15,065             | 0.008 | No  | 0.2   | -2.19 | 0.024            | No                | 0.13             | -2.15            | 194                   |
| 070101 | 148 | 673       | 780    | 1.16 | 460         | 415   | 60                | 2,903              | 0     | No  | 2.95  | 10.88 | 0.709            | Yes               | -0.14            | 0.09             | 517                   |
| 070102 | 20  | 503       | 355    | 0.71 | 471         | 290   | 36                | 1,227              | 0.114 | Yes | 0.81  | -0.15 | 0.021            | No                | -1.18            | 1.01             | 194                   |
| 070201 | 24  | 1,261     | 1,406  | 1.11 | 895         | 956   | 60                | 4,350              | 0     | No  | 1.21  | 0.07  | 0.064            | Yes               | -0.28            | -1.22            | 473                   |
| 070203 | 31  | 438       | 383    | 0.87 | 280         | 175   | 99                | 1,398              | 0     | No  | 1.8   | 2.99  | 0.226            | Yes               | 0.47             | -0.57            | 291                   |
| 080101 | 13  | 176       | 124    | 0.71 | 140         | 106   | 52                | 396                | 0.03  | No  | 0.69  | -1.18 | 0.43             | Yes               | 0.14             | -1.48            | 194                   |
| 080201 | 4   | 4,575     | 2,783  | 0.61 | 5,640       | 1,112 | 855               | 6,483              | 0.11  | Yes | -0.63 | -1.78 | 0.014            | No                | -0.73            | -1.7             | 143                   |
| 090101 | 4   | 99        | 26     | 0.26 | 103         | 25    | 70                | 120                | 0.233 | Yes | -0.15 | -2.27 | 0.268            | Yes               | -0.21            | -2.2             | 26                    |
| 090102 | 66  | 775       | 1,881  | 2.43 | 163         | 148   | 63                | 6,025              | 0     | No  | 4.08  | 17.59 | 0                | No                | 1.02             | 0.28             | 2,268                 |
| 090201 | 13  | 10,598    | 17,018 | 1.61 | 2,926       | 3,742 | 185               | 48,900             | 0     | No  | 1.53  | 1.08  | 0.539            | Yes               | 0.14             | -1.48            | 996                   |

n: number of observations,  $\bar{m}$ : mean, SD: standard deviation, VC: coefficient of variation,  $\tilde{m}$ : median, MAD: median absolute deviation, 95% CI: confidence interval [2.5<sup>th</sup> quantile, 97.5<sup>th</sup> quantile], p: p-value of Shapiro-Wilk test (normally distributed if p>0.05), ND: normally distributed data Yes/No, S: skewness, K: kurtosis; log(subscripted): respective values after log-transformation.

## 6. Battery mass (BM)

### 6.1. Data on Battery Mass (BM) for all Batteries (BATT)

**Table S6.** Descriptive statistics for the mass of batteries in WEEE differentiated in UNUkeys. The table comprises descriptive statistics, the results of the Shapiro-Wilk test on the normal distribution (ND) for original and log-transformed (log) data sets, and the results of for minimum samples sizes according to the parametric approach  $n_{\min}(\text{PA})$ .

| UNUkey | BATTkey | n   | $\bar{m}$ | SD  | VC   | $\tilde{m}$ | MAD | 2.5 <sup>th</sup> | 97.5 <sup>th</sup> | p     | ND  | S     | K      | p <sub>log</sub> | ND <sub>log</sub> | S <sub>log</sub> | K <sub>log</sub> | $n_{\min}(\text{PA})$ |
|--------|---------|-----|-----------|-----|------|-------------|-----|-------------------|--------------------|-------|-----|-------|--------|------------------|-------------------|------------------|------------------|-----------------------|
| all    | BATT    | 790 | 77        | 280 | 3.62 | 21          | 25  | 2                 | 546                | 0     | No  | 10.37 | 143.46 | 0                | No                | 0.6              | 0.46             | 5,034                 |
| 0201   | BATT    | 23  | 26        | 28  | 1.1  | 23          | 12  | 2                 | 98                 | 0     | No  | 2.48  | 6.66   | 0.015            | No                | -0.49            | -0.51            | 465                   |
| 0202   | BATT    | 13  | 39        | 35  | 0.89 | 46          | 64  | 3                 | 100                | 0.027 | No  | 0.36  | -1.19  | 0.002            | No                | -0.34            | -1.91            | 304                   |
| 0204   | BATT    | 29  | 357       | 241 | 0.67 | 264         | 258 | 80                | 821                | 0.008 | No  | 0.6   | -0.98  | 0.144            | Yes               | -0.19            | -1.22            | 172                   |
| 0205   | BATT    | 48  | 26        | 10  | 0.36 | 23          | 6   | 14                | 47                 | 0     | No  | 0.83  | -0.32  | 0.043            | No                | 0.24             | -0.66            | 50                    |
| 0301   | BATT    | 51  | 121       | 693 | 5.71 | 12          | 16  | 1                 | 220                | 0     | No  | 6.69  | 43.8   | 0                | No                | 0.82             | 1.12             | 12,525                |
| 0302   | BATT    | 118 | 3         | 3   | 0.94 | 3           | 0   | 3                 | 6                  | 0     | No  | 9.24  | 90.11  | 0                | No                | 6.06             | 42.75            | 339                   |
| 0303   | BATT    | 29  | 209       | 193 | 0.92 | 252         | 299 | 2                 | 481                | 0     | No  | 0.06  | -1.82  | 0                | No                | -0.39            | -1.75            | 325                   |
| 0305   | BATT    | 52  | 33        | 54  | 1.66 | 22          | 15  | 11                | 84                 | 0     | No  | 5.93  | 37.08  | 0                | No                | 1.37             | 3.38             | 1,059                 |
| 0306   | BATT    | 93  | 29        | 18  | 0.61 | 21          | 5   | 15                | 77                 | 0     | No  | 2.24  | 5.46   | 0                | No                | 1.19             | 0.71             | 143                   |
| 0401   | BATT    | 121 | 22        | 14  | 0.66 | 22          | 16  | 3                 | 48                 | 0     | No  | 1.36  | 2.71   | 0                | No                | -0.55            | 0.39             | 167                   |
| 0402   | BATT    | 29  | 73        | 161 | 2.2  | 24          | 12  | 3                 | 440                | 0     | No  | 3.96  | 16.07  | 0.057            | Yes               | 0.53             | 0.63             | 1,859                 |
| 0403   | BATT    | 7   | 71        | 73  | 1.04 | 37          | 21  | 10                | 197                | 0.038 | No  | 0.87  | -1.05  | 0.781            | Yes               | -0.02            | -1.35            | 416                   |
| 0406   | BATT    | 18  | 36        | 63  | 1.77 | 18          | 11  | 3                 | 197                | 0     | No  | 3.06  | 8.68   | 0.156            | Yes               | 0.26             | 0.21             | 1,204                 |
| 0501   | BATT    | 16  | 79        | 124 | 1.57 | 33          | 39  | 3                 | 376                | 0     | No  | 2.56  | 6.09   | 0.224            | Yes               | -0.26            | -0.72            | 947                   |
| 0506   | BATT    | 15  | 238       | 708 | 2.97 | 32          | 27  | 3                 | 1,940              | 0     | No  | 3.04  | 7.98   | 0.14             | Yes               | 0.81             | 0.57             | 3,389                 |
| 0601   | BATT    | 32  | 469       | 560 | 1.19 | 342         | 458 | 12                | 2,043              | 0     | No  | 1.55  | 1.7    | 0.021            | No                | -0.46            | -0.99            | 544                   |
| 0701   | BATT    | 42  | 38        | 25  | 0.66 | 34          | 24  | 3                 | 90                 | 0.085 | Yes | 0.38  | -0.77  | 0.001            | No                | -1.02            | 0.13             | 167                   |
| 0702   | BATT    | 5   | 33        | 6   | 0.19 | 35          | 4   | 24                | 38                 | 0.257 | Yes | -0.52 | -1.71  | 0.186            | Yes               | -0.61            | -1.58            | 14                    |
| 0901   | BATT    | 31  | 10        | 11  | 1.02 | 8           | 0   | 3                 | 46                 | 0     | No  | 2.62  | 5.72   | 0                | No                | 0.57             | 2.34             | 400                   |

n: number of observations,  $\bar{m}$ : mean, SD: standard deviation, VC: coefficient of variation,  $\tilde{m}$ : median, MAD: median absolute deviation, 95% CI: confidence interval [2.5<sup>th</sup> quantile, 97.5<sup>th</sup> quantile], p: p-value of Shapiro-Wilk test (normally distributed if  $p > 0.05$ ), ND: normally distributed data Yes/No, S: skewness, K: kurtosis; log(subscripted): respective values after log-transformation.

## 6.2. Data on Battery Mass (BM) for Batteries differentiated by BATTkey

**Table S7.** Descriptive statistics for the mass of batteries in WEEE differentiated in UNUkeys and BATTkeys. The table comprises descriptive statistics, the results of the Shapiro-Wilk test on the normal distribution (ND) for original and log-transformed (log) data sets, and the results of for minimum samples sizes according to the parametric approach  $n_{\min}(\text{PA})$ .

| UNUkey | BATTkey     | n   | $\bar{m}$ | SD    | VC   | $\tilde{m}$ | MAD | 2.5 <sup>th</sup> | 97.5 <sup>th</sup> | p     | ND  | S     | K     | p <sub>log</sub> | ND <sub>log</sub> | S <sub>log</sub> | K <sub>log</sub> | n <sub>min</sub> (PA) |
|--------|-------------|-----|-----------|-------|------|-------------|-----|-------------------|--------------------|-------|-----|-------|-------|------------------|-------------------|------------------|------------------|-----------------------|
| all    | LiPrim      | 195 | 4         | 3     | 0.8  | 3           | 0   | 2                 | 9                  | 0     | No  | 5.44  | 41.79 | 0                | No                | 1.95             | 4.74             | 246                   |
| all    | LiRecharge  | 135 | 74        | 121   | 1.64 | 23          | 8   | 9                 | 429                | 0     | No  | 2.22  | 3.48  | 0                | No                | 0.99             | 1.18             | 1,033                 |
| all    | NiCd        | 44  | 307       | 441   | 1.44 | 67          | 71  | 14                | 1,536              | 0     | No  | 2.09  | 4.51  | 0.001            | No                | 0.28             | -1.46            | 797                   |
| all    | NiMH        | 130 | 69        | 115   | 1.66 | 26          | 21  | 10                | 487                | 0     | No  | 3     | 8.44  | 0                | No                | 0.93             | 0.76             | 1,059                 |
| all    | Pb          | 13  | 1,336     | 1,417 | 1.06 | 799         | 429 | 15                | 4,305              | 0.006 | No  | 1.27  | 0.59  | 0.007            | No                | -1.1             | 0.05             | 432                   |
| all    | Zn          | 257 | 38        | 66    | 1.73 | 23          | 17  | 2                 | 151                | 0     | No  | 8.38  | 91.51 | 0                | No                | -0.27            | 1.62             | 1,150                 |
| all    | unspecified | 16  | 47        | 101   | 2.17 | 7           | 7   | 2                 | 301                | 0     | No  | 2.65  | 6.31  | 0.034            | No                | 0.7              | -0.87            | 1,809                 |
| 0201   | Zn          | 13  | 28        | 17    | 0.59 | 23          | 2   | 6                 | 62                 | 0.021 | No  | 0.9   | 0.16  | 0.001            | No                | -1.64            | 2.91             | 134                   |
| 0201   | LiPrim      | 4   | 6         | 6     | 1.08 | 3           | 1   | 2                 | 14                 | 0.01  | No  | 0.74  | -1.7  | 0.105            | Yes               | 0.64             | -1.74            | 448                   |
| 0202   | Zn          | 6   | 58        | 20    | 0.34 | 50          | 5   | 46                | 92                 | 0.008 | No  | 1.17  | -0.43 | 0.032            | No                | 1.05             | -0.65            | 44                    |
| 0202   | LiPrim      | 5   | 3         | 0     | 0.03 | 3           | 0   | 3                 | 3                  | 0.03  | No  | -0.89 | -1.09 | 0.026            | No                | -0.9             | -1.08            | 0                     |
| 0204   | Pb          | 6   | 721       | 119   | 0.17 | 767         | 83  | 557               | 828                | 0.154 | Yes | -0.42 | -1.91 | 0.126            | Yes               | -0.47            | -1.86            | 11                    |
| 0204   | NiMH        | 15  | 296       | 165   | 0.56 | 233         | 136 | 83                | 570                | 0.117 | Yes | 0.43  | -1.37 | 0.454            | Yes               | -0.34            | -0.85            | 120                   |
| 0205   | NiCd        | 11  | 31        | 10    | 0.33 | 36          | 12  | 19                | 44                 | 0.035 | No  | -0.05 | -1.95 | 0.027            | No                | -0.15            | -1.95            | 42                    |
| 0205   | NiMH        | 30  | 25        | 10    | 0.39 | 23          | 4   | 13                | 49                 | 0.001 | No  | 1.14  | 0.57  | 0.095            | Yes               | 0.37             | -0.3             | 58                    |
| 0205   | LiRecharge  | 4   | 26        | 8     | 0.32 | 26          | 11  | 19                | 33                 | 0.025 | No  | 0     | -2.44 | 0.026            | No                | 0                | -2.44            | 39                    |
| 0301   | Zn          | 29  | 32        | 48    | 1.52 | 23          | 29  | 1                 | 119                | 0     | No  | 3.85  | 16    | 0.002            | No                | -0.52            | -0.78            | 888                   |
| 0301   | LiPrim      | 10  | 2         | 1     | 0.3  | 2           | 1   | 1                 | 3                  | 0.086 | Yes | -0.2  | -1.74 | 0.087            | Yes               | -0.47            | -1.25            | 35                    |
| 0301   | unspecified | 5   | 3         | 2     | 0.68 | 2           | 0   | 2                 | 7                  | 0.005 | No  | 0.98  | -1.06 | 0.02             | No                | 0.84             | -1.27            | 178                   |
| 0302   | LiPrim      | 116 | 3         | 1     | 0.23 | 3           | 0   | 3                 | 4                  | 0     | No  | 7.29  | 60.08 | 0                | No                | 4.85             | 36.36            | 20                    |



| UNUkey | BATTkey    | n   | $\bar{m}$ | SD  | VC   | $\tilde{m}$ | MAD | 2.5 <sup>th</sup> | 97.5 <sup>th</sup> | p     | ND  | S     | K     | p <sub>log</sub> | ND <sub>log</sub> | S <sub>log</sub> | K <sub>log</sub> | n <sub>min</sub> (PA) |
|--------|------------|-----|-----------|-----|------|-------------|-----|-------------------|--------------------|-------|-----|-------|-------|------------------|-------------------|------------------|------------------|-----------------------|
| 0303   | LiPrim     | 8   | 3         | 0   | 0.11 | 3           | 0   | 3                 | 4                  | 0.765 | Yes | 0.16  | -1.37 | 0.825            | Yes               | 0.01             | -1.3             | 5                     |
| 0303   | LiRecharge | 19  | 317       | 149 | 0.47 | 351         | 110 | 22                | 486                | 0.013 | No  | -0.88 | -0.55 | 0                | No                | -2.59            | 6.38             | 85                    |
| 0305   | Zn         | 10  | 28        | 16  | 0.56 | 29          | 24  | 11                | 45                 | 0.006 | No  | -0.01 | -2.07 | 0.007            | No                | -0.13            | -2.04            | 120                   |
| 0305   | NiMH       | 33  | 23        | 13  | 0.56 | 21          | 15  | 10                | 51                 | 0     | No  | 0.98  | 0.08  | 0.004            | No                | 0.27             | -1.24            | 120                   |
| 0305   | LiRecharge | 6   | 24        | 12  | 0.5  | 18          | 4   | 15                | 43                 | 0.051 | Yes | 0.83  | -1.16 | 0.145            | Yes               | 0.63             | -1.53            | 96                    |
| 0306   | NiMH       | 24  | 46        | 25  | 0.55 | 43          | 29  | 16                | 97                 | 0.057 | Yes | 0.74  | -0.09 | 0.258            | Yes               | -0.12            | -1.2             | 116                   |
| 0306   | LiRecharge | 69  | 23        | 9   | 0.37 | 20          | 3   | 16                | 47                 | 0     | No  | 2.65  | 8.66  | 0                | No                | 1.38             | 2.65             | 53                    |
| 0401   | Zn         | 105 | 21        | 12  | 0.57 | 22          | 15  | 6                 | 48                 | 0     | No  | 0.96  | 0.05  | 0                | No                | -0.04            | -0.81            | 125                   |
| 0401   | LiPrim     | 6   | 4         | 2   | 0.68 | 3           | 1   | 2                 | 8                  | 0.001 | No  | 1.3   | -0.18 | 0.011            | No                | 1.16             | -0.41            | 178                   |
| 0401   | NiMH       | 4   | 38        | 20  | 0.53 | 41          | 17  | 13                | 57                 | 0.803 | Yes | -0.3  | -1.97 | 0.279            | Yes               | -0.57            | -1.81            | 108                   |
| 0402   | Zn         | 16  | 118       | 209 | 1.78 | 40          | 44  | 6                 | 632                | 0     | No  | 2.7   | 6.64  | 0.92             | Yes               | 0.12             | -0.23            | 1,217                 |
| 0402   | LiRecharge | 9   | 21        | 7   | 0.32 | 23          | 6   | 8                 | 27                 | 0.102 | Yes | -0.99 | -0.2  | 0.003            | No                | -1.55            | 1.19             | 39                    |
| 0403   | Zn         | 5   | 90        | 80  | 0.88 | 46          | 34  | 24                | 201                | 0.204 | Yes | 0.47  | -1.86 | 0.561            | Yes               | 0.18             | -2.06            | 297                   |
| 0406   | Zn         | 6   | 30        | 30  | 0.99 | 23          | 9   | 11                | 83                 | 0.003 | No  | 1.24  | -0.27 | 0.134            | Yes               | 0.7              | -0.99            | 377                   |
| 0406   | LiPrim     | 4   | 10        | 8   | 0.8  | 10          | 10  | 3                 | 17                 | 0.048 | No  | 0.01  | -2.43 | 0.034            | No                | 0                | -2.44            | 246                   |
| 0406   | LiRecharge | 7   | 20        | 12  | 0.58 | 20          | 12  | 4                 | 37                 | 0.994 | Yes | -0.04 | -1.44 | 0.103            | Yes               | -1.03            | -0.39            | 129                   |
| 0501   | Zn         | 9   | 71        | 52  | 0.73 | 49          | 39  | 23                | 153                | 0.07  | Yes | 0.52  | -1.54 | 0.197            | Yes               | 0.13             | -1.87            | 205                   |
| 0506   | Zn         | 7   | 91        | 134 | 1.47 | 46          | 33  | 23                | 344                | 0     | No  | 1.57  | 0.68  | 0.053            | Yes               | 1.08             | -0.29            | 830                   |
| 0506   | NiMH       | 4   | 37        | 28  | 0.78 | 31          | 24  | 10                | 72                 | 0.709 | Yes | 0.32  | -2.01 | 0.938            | Yes               | -0.11            | -2.08            | 234                   |
| 0601   | NiCd       | 19  | 613       | 527 | 0.86 | 516         | 237 | 26                | 1826               | 0.013 | No  | 1.15  | 0.76  | 0.011            | No                | -0.93            | -0.3             | 284                   |
| 0601   | NiMH       | 6   | 91        | 173 | 1.89 | 22          | 10  | 15                | 392                | 0     | No  | 1.36  | -0.09 | 0.003            | No                | 1.24             | -0.28            | 1,372                 |
| 0601   | LiRecharge | 5   | 154       | 122 | 0.79 | 180         | 203 | 33                | 314                | 0.43  | Yes | 0.24  | -1.82 | 0.301            | Yes               | -0.19            | -2.13            | 240                   |
| 0701   | Zn         | 37  | 39        | 25  | 0.63 | 36          | 24  | 4                 | 91                 | 0.152 | Yes | 0.36  | -0.8  | 0.003            | No                | -1.08            | 0.6              | 152                   |
| 0901   | Zn         | 8   | 19        | 19  | 1.04 | 7           | 5   | 3                 | 46                 | 0.009 | No  | 0.52  | -1.78 | 0.038            | No                | 0.27             | -1.99            | 416                   |
| 0901   | LiPrim     | 23  | 8         | 1   | 0.18 | 8           | 0   | 5                 | 8                  | 0     | No  | -4.19 | 16.26 | 0                | No                | -4.19            | 16.26            | 12                    |

46 n: number of observations,  $\bar{m}$ : mean, SD: standard deviation, VC: coefficient of variation,  $\tilde{m}$ : median, MAD: median absolute deviation, 95% CI: confidence interval [2.5<sup>th</sup> quantile,  
47 97.5<sup>th</sup> quantile], p: p-value of Shapiro-Wilk test (normally distributed if p>0.05), ND: normally distributed data Yes/No, S: skewness, K: kurtosis; log(subscripted): respective values  
48 after log-transformation.

## 7. Battery Mass Share (BMS)

The following information on BMS refers to WEEE with a battery compartment and remaining batteries. A distinction is made between all batteries (BATT) and the various battery systems (BATTkeys).

### 7.1. Data on Battery Mass Share (BMS) for all Batteries (BATT)

**Table S8.** Descriptive statistics for battery mass share of WEEE differentiated in UNUkeys. The table comprises descriptive statistics, the results of the Shapiro-Wilk test on the normal distribution (ND) for original and log-transformed (log) data sets, and the results of for minimum samples sizes according to the parametric approach  $n_{\min}(\text{PA})$ .

| UNUkey | BATTkey | n   | $\bar{x}$ | SD    | VC   | $\tilde{x}$ | MAD   | 2.5 <sup>th</sup> | 97.5 <sup>th</sup> | S     | K     | SW    | ND  | SW <sub>log</sub> | ND <sub>log</sub> | S <sub>log</sub> | K <sub>log</sub> | $n_{\min}(\text{PA})$ |
|--------|---------|-----|-----------|-------|------|-------------|-------|-------------------|--------------------|-------|-------|-------|-----|-------------------|-------------------|------------------|------------------|-----------------------|
| all    | BATT    | 790 | 15.22     | 13.88 | 0.91 | 12.92       | 14.31 | 0.02              | 47.92              | 1.25  | 2.3   | 0     | No  | 0                 | No                | -1.3             | 0.16             | 318                   |
| 0201   | BATT    | 23  | 12.32     | 11.53 | 0.94 | 8.65        | 6.51  | 1.03              | 37.65              | 1.17  | 0.02  | 0.001 | No  | 0.427             | Yes               | -0.46            | -0.4             | 339                   |
| 0202   | BATT    | 13  | 4.45      | 6.11  | 1.37 | 2.29        | 3.1   | 0.15              | 18.05              | 1.45  | 0.54  | 0.001 | No  | 0.157             | Yes               | -0.18            | -1.46            | 721                   |
| 0204   | BATT    | 29  | 26.32     | 14.21 | 0.54 | 20.19       | 9.44  | 10.86             | 54.05              | 0.84  | -0.57 | 0.003 | No  | 0.158             | Yes               | 0.28             | -1.21            | 112                   |
| 0205   | BATT    | 48  | 18.71     | 7.76  | 0.41 | 18.3        | 8.35  | 7.89              | 37.57              | 0.87  | 0.47  | 0.01  | No  | 0.769             | Yes               | -0.03            | -0.62            | 65                    |
| 0301   | BATT    | 51  | 10.7      | 14.16 | 1.32 | 5.22        | 4.96  | 0.88              | 55.71              | 2.49  | 6.18  | 0     | No  | 0.937             | Yes               | 0.03             | -0.14            | 669                   |
| 0302   | BATT    | 118 | 0.04      | 0.08  | 1.84 | 0.03        | 0.01  | 0.02              | 0.1                | 9.35  | 92.4  | 0     | No  | 0                 | No                | 2.92             | 14.17            | 1,301                 |
| 0303   | BATT    | 29  | 8.73      | 7.58  | 0.87 | 12.55       | 6.28  | 0.06              | 20.08              | -0.01 | -1.46 | 0     | No  | 0                 | No                | -0.47            | -1.72            | 291                   |
| 0305   | BATT    | 52  | 15.72     | 10.32 | 0.66 | 11.17       | 7.24  | 3.01              | 37.65              | 1.03  | 0.49  | 0     | No  | 0.191             | Yes               | -0.17            | -0.61            | 167                   |
| 0306   | BATT    | 93  | 25.4      | 9.07  | 0.36 | 23.44       | 5.41  | 14.3              | 46.5               | 0.85  | 0.77  | 0     | No  | 0                 | No                | -5.6             | 43.71            | 50                    |
| 0401   | BATT    | 121 | 18.59     | 9.72  | 0.52 | 17          | 9.64  | 5                 | 40.83              | 0.86  | 0.37  | 0     | No  | 0.022             | No                | -0.57            | 0.71             | 104                   |
| 0402   | BATT    | 29  | 17.09     | 13.28 | 0.78 | 13          | 7.71  | 2.06              | 56.5               | 1.82  | 3.32  | 0     | No  | 0.026             | No                | -0.91            | 1.47             | 234                   |
| 0403   | BATT    | 7   | 19.34     | 24.34 | 1.26 | 3.48        | 3.14  | 1.45              | 60.43              | 0.78  | -1.06 | 0.034 | No  | 0.114             | Yes               | 0.23             | -2.05            | 610                   |
| 0406   | BATT    | 18  | 9.94      | 8.46  | 0.85 | 6.89        | 7.79  | 0.27              | 28.1               | 0.88  | -0.27 | 0.041 | No  | 0.003             | No                | -1.1             | -0.04            | 278                   |
| 0501   | BATT    | 16  | 33.64     | 21.59 | 0.64 | 37.92       | 18.68 | 2.75              | 68.71              | -0.08 | -1.21 | 0.229 | Yes | 0.003             | No                | -0.92            | -0.81            | 157                   |
| 0506   | BATT    | 15  | 24.92     | 15.83 | 0.64 | 22.86       | 18.32 | 3.11              | 54.09              | 0.42  | -0.86 | 0.909 | Yes | 0.006             | No                | -1.65            | 2.63             | 157                   |
| 0601   | BATT    | 32  | 26        | 19.25 | 0.74 | 21.58       | 15.54 | 0.14              | 79.19              | 1.45  | 2.39  | 0.001 | No  | 0                 | No                | -2.42            | 6.01             | 210                   |
| 0701   | BATT    | 42  | 15.26     | 14.1  | 0.92 | 11.35       | 9.93  | 0.23              | 38.25              | 1.95  | 5.35  | 0     | No  | 0.001             | No                | -1.36            | 2.11             | 325                   |
| 0702   | BATT    | 5   | 19        | 9.36  | 0.49 | 25          | 1.82  | 8.29              | 26.23              | -0.29 | -2.24 | 0.022 | No  | 0.024             | No                | -0.3             | -2.22            | 92                    |

| UNUkey | BATTkey | n  | $\bar{x}$ | SD   | VC   | $\tilde{x}$ | MAD | 2.5 <sup>th</sup> | 97.5 <sup>th</sup> | S    | K    | SW | ND | SW <sub>log</sub> | ND <sub>log</sub> | S <sub>log</sub> | K <sub>log</sub> | n <sub>min</sub> (PA) |
|--------|---------|----|-----------|------|------|-------------|-----|-------------------|--------------------|------|------|----|----|-------------------|-------------------|------------------|------------------|-----------------------|
| 0901   | BATT    | 31 | 11.08     | 5.65 | 0.51 | 12.45       | 0   | 0.6               | 22.73              | 0.19 | 1.53 | 0  | No | 0                 | No                | -1.7             | 1.9              | 100                   |

n: number of observations,  $\bar{x}$ : mean, SD: standard deviation, VC: coefficient of variation,  $\tilde{x}$ : median, MAD: median absolute deviation, 95% CI: confidence interval [2.5<sup>th</sup> quantile, 97.5<sup>th</sup> quantile], p: p-value of Shapiro-Wilk test (normally distributed if p>0.05), ND: normally distributed data Yes/No, S: skewness, K: kurtosis; log(subscripted): respective values after log-transformation.

**Table S9.** Descriptive statistics for battery mass share of WEEE differentiated in subKeys. The table comprises descriptive statistics, the results of the Shapiro-Wilk test on the normal distribution (ND) for original and log-transformed (log) data sets, and the results of for minimum samples sizes according to the parametric approach n<sub>min</sub>(PA).

| subKey | BATTkey | n   | $\bar{x}$ | SD    | VC   | $\tilde{x}$ | MAD   | 2.5 <sup>th</sup> | 97.5 <sup>th</sup> | S     | K     | SW    | ND  | SW <sub>log</sub> | ND <sub>log</sub> | S <sub>log</sub> | K <sub>log</sub> | n <sub>min</sub> (PA) |
|--------|---------|-----|-----------|-------|------|-------------|-------|-------------------|--------------------|-------|-------|-------|-----|-------------------|-------------------|------------------|------------------|-----------------------|
| 020108 | BATT    | 20  | 12.79     | 12.24 | 0.96 | 8.75        | 7.46  | 0.98              | 37.75              | 1.03  | -0.44 | 0.001 | No  | 0.444             | Yes               | -0.42            | -0.69            | 354                   |
| 020206 | BATT    | 11  | 3.31      | 5.36  | 1.62 | 1.94        | 2.54  | 0.15              | 15.35              | 2.08  | 3.23  | 0     | No  | 0.221             | Yes               | 0                | -1.49            | 1008                  |
| 020401 | BATT    | 5   | 23.65     | 13.61 | 0.58 | 19.05       | 10.08 | 11.27             | 43.96              | 0.67  | -1.37 | 0.355 | Yes | 0.953             | Yes               | 0.22             | -1.63            | 129                   |
| 020402 | BATT    | 24  | 26.87     | 14.55 | 0.54 | 21.08       | 11.87 | 11.38             | 55.23              | 0.81  | -0.67 | 0.009 | No  | 0.214             | Yes               | 0.27             | -1.29            | 112                   |
| 020502 | BATT    | 21  | 16.15     | 7.81  | 0.48 | 13.3        | 4.38  | 7.57              | 33.54              | 1.18  | 0.81  | 0.012 | No  | 0.687             | Yes               | 0.37             | -0.77            | 89                    |
| 020506 | BATT    | 26  | 20.77     | 7.38  | 0.36 | 19.1        | 7.9   | 10.76             | 36.82              | 0.84  | 0.49  | 0.106 | Yes | 0.89              | Yes               | -0.02            | -0.47            | 50                    |
| 030101 | BATT    | 6   | 18.14     | 9.17  | 0.51 | 15.96       | 2.12  | 9.68              | 33.55              | 1.02  | -0.51 | 0.042 | No  | 0.364             | Yes               | 0.42             | -0.91            | 100                   |
| 030102 | BATT    | 14  | 7.76      | 11.67 | 1.5  | 5.02        | 3.55  | 1.97              | 35.35              | 2.74  | 6.47  | 0     | No  | 0.035             | No                | 1.16             | 0.99             | 864                   |
| 030108 | BATT    | 20  | 6.56      | 6.93  | 1.06 | 3.71        | 3.18  | 0.91              | 23.43              | 1.58  | 1.7   | 0     | No  | 0.774             | Yes               | 0.17             | -1.04            | 432                   |
| 030109 | BATT    | 7   | 16.25     | 23.47 | 1.44 | 6.65        | 5.67  | 2.91              | 60.57              | 1.51  | 0.56  | 0     | No  | 0.415             | Yes               | 0.7              | -0.88            | 797                   |
| 030201 | BATT    | 118 | 0.04      | 0.08  | 1.84 | 0.03        | 0.01  | 0.02              | 0.1                | 9.35  | 92.4  | 0     | No  | 0                 | No                | 2.92             | 14.17            | 1301                  |
| 030301 | BATT    | 27  | 7.85      | 6.99  | 0.89 | 12.14       | 5.21  | 0.06              | 16.53              | -0.13 | -1.92 | 0     | No  | 0                 | No                | -0.36            | -1.82            | 304                   |
| 030502 | BATT    | 45  | 15.77     | 10.85 | 0.69 | 10.12       | 7.77  | 2.91              | 38.65              | 0.99  | 0.25  | 0     | No  | 0.19              | Yes               | -0.12            | -0.79            | 183                   |
| 030503 | BATT    | 7   | 15.44     | 6.44  | 0.42 | 12.97       | 4.98  | 9.66              | 25.48              | 0.51  | -1.51 | 0.189 | Yes | 0.264             | Yes               | 0.28             | -1.84            | 68                    |
| 030601 | BATT    | 91  | 25.38     | 9.16  | 0.36 | 23.44       | 5.41  | 14.28             | 46.59              | 0.85  | 0.7   | 0     | No  | 0                 | No                | -5.54            | 42.71            | 50                    |
| 040104 | BATT    | 119 | 18.67     | 9.74  | 0.52 | 17          | 9.64  | 4.94              | 40.94              | 0.85  | 0.35  | 0     | No  | 0.019             | No                | -0.59            | 0.78             | 104                   |
| 040201 | BATT    | 4   | 32.67     | 18.77 | 0.57 | 25.54       | 7.63  | 19.73             | 57.74              | 0.63  | -1.78 | 0.115 | Yes | 0.313             | Yes               | 0.5              | -1.9             | 125                   |
| 040202 | BATT    | 18  | 14.97     | 12.55 | 0.84 | 11.7        | 8.85  | 1.66              | 43.47              | 1.69  | 3.06  | 0.003 | No  | 0.3               | Yes               | -0.73            | 0.2              | 271                   |
| 040205 | BATT    | 7   | 13.61     | 3.27  | 0.24 | 13          | 2.97  | 9.27              | 18.64              | 0.29  | -1.06 | 0.873 | Yes | 0.935             | Yes               | -0.12            | -1.11            | 22                    |
| 040304 | BATT    | 5   | 19.47     | 27.71 | 1.42 | 2           | 0.93  | 1.42              | 61.21              | 0.73  | -1.44 | 0.038 | No  | 0.102             | Yes               | 0.34             | -2.12            | 775                   |

| subKey | BATTkey | n  | $\bar{x}$ | SD    | VC   | $\tilde{x}$ | MAD   | 2.5 <sup>th</sup> | 97.5 <sup>th</sup> | S     | K     | SW    | ND  | SW <sub>log</sub> | ND <sub>log</sub> | S <sub>log</sub> | K <sub>log</sub> | n <sub>min</sub> (PA) |
|--------|---------|----|-----------|-------|------|-------------|-------|-------------------|--------------------|-------|-------|-------|-----|-------------------|-------------------|------------------|------------------|-----------------------|
| 040601 | BATT    | 17 | 10.51     | 8.36  | 0.8  | 7.11        | 5.87  | 0.27              | 28.16              | 0.86  | -0.33 | 0.056 | Yes | 0.003             | No                | -1.36            | 1.07             | 246                   |
| 050101 | BATT    | 12 | 40.79     | 18.68 | 0.46 | 42.14       | 9.6   | 7.64              | 69.17              | -0.33 | -0.53 | 0.732 | Yes | 0                 | No                | -2.04            | 3.39             | 81                    |
| 050601 | BATT    | 6  | 35.14     | 14.7  | 0.42 | 30.45       | 11.93 | 18.72             | 56.4               | 0.37  | -1.63 | 0.609 | Yes | 0.847             | Yes               | -0.03            | -1.58            | 68                    |
| 050602 | BATT    | 9  | 18.1      | 13.15 | 0.73 | 15.68       | 10.64 | 2.1               | 39.27              | 0.46  | -1.31 | 0.48  | Yes | 0.048             | No                | -1.21            | 0.54             | 205                   |
| 060102 | BATT    | 18 | 27.78     | 12.72 | 0.46 | 31.27       | 11.76 | 4.43              | 44.12              | -0.55 | -0.85 | 0.349 | Yes | 0                 | No                | -2.92            | 8.2              | 81                    |
| 060109 | BATT    | 10 | 14.72     | 4.84  | 0.33 | 14.26       | 4.24  | 7.39              | 22.11              | 0.05  | -1.2  | 0.981 | Yes | 0.762             | Yes               | -0.52            | -0.76            | 42                    |
| 070101 | BATT    | 36 | 16.36     | 14.69 | 0.9  | 12.58       | 10.47 | 0.2               | 42.92              | 1.85  | 4.63  | 0     | No  | 0                 | No                | -1.57            | 2.93             | 311                   |
| 070102 | BATT    | 6  | 8.64      | 7.66  | 0.89 | 7.23        | 8.48  | 1.13              | 19.45              | 0.32  | -1.81 | 0.446 | Yes | 0.623             | Yes               | -0.21            | -1.91            | 304                   |
| 090102 | BATT    | 31 | 11.08     | 5.65  | 0.51 | 12.45       | 0     | 0.6               | 22.73              | 0.19  | 1.53  | 0     | No  | 0                 | No                | -1.7             | 1.9              | 100                   |

n: number of observations,  $\bar{x}$ : mean, SD: standard deviation, VC: coefficient of variation,  $\tilde{x}$ : median, MAD: median absolute deviation, 95% CI: confidence interval [2.5<sup>th</sup> quantile, 97.5<sup>th</sup> quantile], p: p-value of Shapiro-Wilk test (normally distributed if p>0.05), ND: normally distributed data Yes/No, S: skewness, K: kurtosis; log(subscripted): respective values after log-transformation.

## 7.2. Data on Battery Mass Share (BMS) for Batteries differentiated by BATTkey

**Table S10.** Descriptive statistics for battery mass share of batteries in WEEE differentiated in UNUkeys and BATTkeys. The table comprises descriptive statistics, the results of the Shapiro-Wilk test on the normal distribution (ND) for original and log-transformed (log) data sets, and the results of for minimum samples sizes according to the parametric approach n<sub>min</sub>(PA).

| UNUkey | BATTkey     | n   | $\bar{x}$ | SD    | VC   | $\tilde{x}$ | MAD   | 2.5 <sup>th</sup> | 97.5 <sup>th</sup> | S     | K     | p     | ND  | p <sub>log</sub> | ND <sub>log</sub> | S <sub>log</sub> | K <sub>log</sub> | n <sub>min</sub> (PA) |
|--------|-------------|-----|-----------|-------|------|-------------|-------|-------------------|--------------------|-------|-------|-------|-----|------------------|-------------------|------------------|------------------|-----------------------|
| all    | LiPrim      | 195 | 2.26      | 4.31  | 1.91 | 0.05        | 0.03  | 0.02              | 12.45              | 1.77  | 1.52  | 0     | No  | 0                | No                | 0.92             | -0.87            | 1,401                 |
| all    | LiRecharge  | 135 | 19.78     | 9     | 0.46 | 19.87       | 7.22  | 1.94              | 42.92              | 0.83  | 2.92  | 0     | No  | 0                | No                | -3.95            | 21.38            | 81                    |
| all    | NiCd        | 44  | 23.38     | 15.52 | 0.66 | 22.26       | 13.61 | 0.5               | 45.75              | 1.61  | 4.87  | 0     | No  | 0                | No                | -2.77            | 8.67             | 167                   |
| all    | NiMH        | 130 | 19.01     | 11.53 | 0.61 | 18.05       | 10.87 | 0.65              | 45.18              | 0.72  | -0.08 | 0     | No  | 0                | No                | -2.45            | 8.19             | 143                   |
| all    | Pb          | 13  | 46.09     | 19.3  | 0.42 | 47.89       | 11.76 | 8.81              | 74.05              | -0.58 | -0.4  | 0.284 | Yes | 0.002            | No                | -1.52            | 1.08             | 68                    |
| all    | Zn          | 257 | 17.97     | 13.66 | 0.76 | 14.85       | 11.47 | 1.96              | 53                 | 1.36  | 2.22  | 0     | No  | 0                | No                | -0.69            | 0.27             | 222                   |
| all    | unspecified | 16  | 12.26     | 14.05 | 1.15 | 8.36        | 11.56 | 0.1               | 43.14              | 1.15  | 0.43  | 0.008 | No  | 0.125            | Yes               | -0.76            | -0.57            | 508                   |
| 0201   | Zn          | 13  | 15.06     | 12.01 | 0.8  | 10.91       | 5.19  | 3.83              | 37.96              | 1.01  | -0.69 | 0.003 | No  | 0.374            | Yes               | 0.21             | -0.88            | 246                   |
| 0201   | LiPrim      | 4   | 2.14      | 1.95  | 0.91 | 1.46        | 0.69  | 0.68              | 4.74               | 0.65  | -1.74 | 0.121 | Yes | 0.745            | Yes               | 0.24             | -1.87            | 318                   |
| 0202   | Zn          | 6   | 5.73      | 6.46  | 1.13 | 3.06        | 1.41  | 1.98              | 17.02              | 1.26  | -0.26 | 0.002 | No  | 0.145            | Yes               | 0.89             | -0.9             | 491                   |

| UNUkey | BATTkey     | n   | $\bar{x}$ | SD    | VC   | $\tilde{x}$ | MAD   | 2.5 <sup>th</sup> | 97.5 <sup>th</sup> | S     | K     | p     | ND  | p <sub>log</sub> | ND <sub>log</sub> | S <sub>log</sub> | K <sub>log</sub> | n <sub>min</sub> (PA) |
|--------|-------------|-----|-----------|-------|------|-------------|-------|-------------------|--------------------|-------|-------|-------|-----|------------------|-------------------|------------------|------------------|-----------------------|
| 0202   | LiPrim      | 5   | 0.41      | 0.51  | 1.24 | 0.2         | 0.05  | 0.15              | 1.22               | 1.06  | -0.93 | 0.001 | No  | 0.019            | No                | 0.98             | -1.03            | 591                   |
| 0204   | Pb          | 6   | 48.78     | 7.49  | 0.15 | 48.62       | 3.89  | 38.66             | 59.48              | 0.11  | -1.12 | 0.821 | Yes | 0.804            | Yes               | -0.16            | -1.11            | 9                     |
| 0204   | NiMH        | 15  | 22.01     | 9.44  | 0.43 | 18.63       | 7.22  | 11.43             | 40.39              | 0.85  | -0.3  | 0.097 | Yes | 0.734            | Yes               | 0.28             | -1.14            | 71                    |
| 0205   | NiCd        | 11  | 17.98     | 10.93 | 0.61 | 13.23       | 5.92  | 8.61              | 38.89              | 0.9   | -0.68 | 0.017 | No  | 0.103            | Yes               | 0.51             | -1.47            | 143                   |
| 0205   | NiMH        | 30  | 18.06     | 5.86  | 0.32 | 18.45       | 6.05  | 7.66              | 29.84              | 0.43  | 0.23  | 0.295 | Yes | 0.162            | Yes               | -0.55            | 0.11             | 39                    |
| 0205   | LiRecharge  | 4   | 19.17     | 6.28  | 0.33 | 19.24       | 7.95  | 13.6              | 24.61              | 0     | -2.44 | 0.032 | No  | 0.035            | No                | 0                | -2.44            | 42                    |
| 0301   | Zn          | 29  | 10.33     | 10.67 | 1.03 | 6.08        | 5.31  | 1.87              | 39.29              | 1.92  | 3.44  | 0     | No  | 0.576            | Yes               | 0.2              | -0.85            | 408                   |
| 0301   | LiPrim      | 10  | 4.19      | 2.82  | 0.67 | 3.5         | 2.54  | 1.48              | 9.57               | 0.95  | -0.32 | 0.086 | Yes | 0.781            | Yes               | 0.18             | -1.36            | 172                   |
| 0301   | unspecified | 5   | 2.09      | 2     | 0.96 | 1           | 1.06  | 0.34              | 4.83               | 0.43  | -1.9  | 0.271 | Yes | 0.744            | Yes               | -0.07            | -1.91            | 354                   |
| 0302   | LiPrim      | 116 | 0.04      | 0.02  | 0.63 | 0.03        | 0.01  | 0.02              | 0.09               | 5.33  | 38.9  | 0     | No  | 0                | No                | 1.51             | 4.38             | 152                   |
| 0303   | LiPrim      | 8   | 0.11      | 0.02  | 0.22 | 0.11        | 0.02  | 0.08              | 0.15               | 0.25  | -0.94 | 0.919 | Yes | 0.944            | Yes               | -0.16            | -1               | 19                    |
| 0303   | LiRecharge  | 19  | 13.26     | 5.16  | 0.39 | 13.62       | 1.64  | 1.01              | 21.68              | -0.78 | 1.66  | 0.002 | No  | 0                | No                | -3.16            | 9.35             | 58                    |
| 0305   | Zn          | 10  | 12.82     | 9.9   | 0.77 | 10.16       | 5.54  | 2.84              | 31.9               | 0.93  | -0.51 | 0.057 | Yes | 0.468            | Yes               | -0.16            | -1.19            | 228                   |
| 0305   | NiMH        | 33  | 13.16     | 7.9   | 0.6  | 9.46        | 3.7   | 3.86              | 29.7               | 1.04  | -0.08 | 0     | No  | 0.111            | Yes               | 0.19             | -0.69            | 138                   |
| 0305   | LiRecharge  | 6   | 25.97     | 7.4   | 0.29 | 24.87       | 5.99  | 18.91             | 37.83              | 0.71  | -1.06 | 0.353 | Yes | 0.713            | Yes               | 0.44             | -1.37            | 32                    |
| 0306   | NiMH        | 24  | 30.57     | 12.38 | 0.4  | 32.88       | 16.73 | 10.07             | 46.38              | -0.36 | -0.69 | 0.069 | Yes | 0                | No                | -3.61            | 13.34            | 61                    |
| 0306   | LiRecharge  | 69  | 23.61     | 6.84  | 0.29 | 22.98       | 4.48  | 14.49             | 45.54              | 1.6   | 3.74  | 0     | No  | 0.002            | No                | 0.18             | 2.11             | 32                    |
| 0401   | Zn          | 105 | 19.11     | 9.75  | 0.51 | 17.43       | 9.04  | 7.01              | 41.7               | 0.89  | 0.35  | 0     | No  | 0.012            | No                | -0.5             | 1.06             | 100                   |
| 0401   | LiPrim      | 6   | 8.5       | 5.26  | 0.62 | 6.75        | 4.31  | 3.83              | 14.98              | 0.33  | -2.02 | 0.071 | Yes | 0.14             | Yes               | 0.15             | -2.08            | 148                   |
| 0401   | NiMH        | 4   | 21.48     | 11.56 | 0.54 | 20.78       | 10.21 | 8.97              | 35.17              | 0.13  | -1.88 | 0.841 | Yes | 0.666            | Yes               | -0.33            | -1.85            | 112                   |
| 0402   | Zn          | 16  | 18.81     | 16.87 | 0.9  | 12.12       | 10.04 | 2.73              | 58.12              | 1.36  | 0.71  | 0.002 | No  | 0.798            | Yes               | -0.11            | -0.71            | 311                   |
| 0402   | LiRecharge  | 9   | 16.26     | 6.36  | 0.39 | 15          | 5.28  | 9.4               | 28.15              | 0.9   | -0.35 | 0.229 | Yes | 0.913            | Yes               | 0.35             | -0.99            | 58                    |
| 0403   | Zn          | 5   | 26.29     | 26.02 | 0.99 | 27.06       | 34.95 | 1.58              | 61.95              | 0.35  | -1.73 | 0.5   | Yes | 0.384            | Yes               | -0.29            | -2.05            | 377                   |
| 0406   | Zn          | 6   | 15.6      | 10.03 | 0.64 | 12.52       | 9.17  | 5.76              | 28.8               | 0.35  | -1.94 | 0.222 | Yes | 0.563            | Yes               | 0.04             | -1.93            | 157                   |
| 0406   | LiPrim      | 4   | 2.5       | 2.57  | 1.03 | 2.39        | 3.12  | 0.24              | 4.96               | 0.01  | -2.42 | 0.086 | Yes | 0.107            | Yes               | -0.02            | -2.41            | 408                   |
| 0406   | LiRecharge  | 7   | 8.88      | 6.62  | 0.75 | 6.67        | 3.22  | 1.02              | 18.41              | 0.36  | -1.58 | 0.402 | Yes | 0.031            | No                | -1.15            | -0.05            | 216                   |
| 0501   | Zn          | 9   | 45.92     | 14.76 | 0.32 | 45          | 12.36 | 26.2              | 69.52              | 0.33  | -1.19 | 0.668 | Yes | 0.843            | Yes               | -0.18            | -1               | 39                    |
| 0506   | Zn          | 7   | 30.4      | 14.06 | 0.46 | 28.84       | 11.36 | 16.2              | 54.5               | 0.8   | -0.73 | 0.347 | Yes | 0.967            | Yes               | 0.25             | -1.34            | 81                    |

| UNUkey | BATTkey    | n  | $\bar{x}$ | SD    | VC   | $\tilde{x}$ | MAD   | 2.5 <sup>th</sup> | 97.5 <sup>th</sup> | S     | K     | p     | ND  | p <sub>log</sub> | ND <sub>log</sub> | S <sub>log</sub> | K <sub>log</sub> | n <sub>min</sub> (PA) |
|--------|------------|----|-----------|-------|------|-------------|-------|-------------------|--------------------|-------|-------|-------|-----|------------------|-------------------|------------------|------------------|-----------------------|
| 0506   | NiMH       | 4  | 23.81     | 17.69 | 0.74 | 18.9        | 12.82 | 10.04             | 45.93              | 0.37  | -2.03 | 0.286 | Yes | 0.306            | Yes               | 0.16             | -2.25            | 210                   |
| 0601   | NiCd       | 19 | 31.67     | 18.13 | 0.57 | 31.58       | 12.59 | 4.37              | 69.57              | 1.25  | 2.87  | 0.014 | No  | 0                | No                | -2.96            | 8.78             | 125                   |
| 0601   | NiMH       | 6  | 13.77     | 4.44  | 0.32 | 13.12       | 4.17  | 7.48              | 18.87              | -0.24 | -1.49 | 0.545 | Yes | 0.257            | Yes               | -0.66            | -1.06            | 39                    |
| 0601   | LiRecharge | 5  | 14.18     | 3.78  | 0.27 | 14.77       | 6.16  | 10.28             | 18.85              | 0.09  | -1.99 | 0.541 | Yes | 0.462            | Yes               | -0.04            | -2.08            | 28                    |
| 0701   | Zn         | 37 | 16.59     | 14.41 | 0.87 | 14.17       | 10.5  | 1.76              | 42                 | 1.88  | 4.88  | 0     | No  | 0.299            | Yes               | -0.54            | -0.15            | 291                   |
| 0901   | Zn         | 8  | 8.6       | 10.4  | 1.21 | 2.64        | 2.02  | 0.81              | 26.93              | 0.88  | -1.07 | 0.011 | No  | 0.46             | Yes               | 0.13             | -1.5             | 562                   |
| 0901   | LiPrim     | 23 | 11.94     | 2.47  | 0.21 | 12.45       | 0     | 7.13              | 12.45              | -4.19 | 16.26 | 0     | No  | 0                | No                | -4.19            | 16.26            | 17                    |

n: number of observations,  $\bar{x}$ : mean, SD: standard deviation, VC: coefficient of variation,  $\tilde{x}$ : median, MAD: median absolute deviation, 95% CI: confidence interval [2.5<sup>th</sup> quantile, 97.5<sup>th</sup> quantile], p: p-value of Shapiro-Wilk test (normally distributed if  $p > 0.05$ ), ND: normally distributed data Yes/No, S: skewness, K: kurtosis; log(subscripted): respective values after log-transformation.

**Table S11.** Descriptive statistics for battery mass share of batteries in WEEE differentiated in subKeys and BATTkeys. The table comprises descriptive statistics, the results of the Shapiro-Wilk test on the normal distribution (ND) for original and log-transformed (log) data sets, and the results of for minimum samples sizes according to the parametric approach  $n_{\min}(\text{PA})$ .

| subKey | BATTkey    | n  | $\bar{x}$ | SD    | VC   | $\tilde{x}$ | MAD  | 2.5 <sup>th</sup> | 97.5 <sup>th</sup> | p     | ND  | S     | K     | p <sub>log</sub> | ND <sub>log</sub> | S <sub>log</sub> | K <sub>log</sub> | n <sub>min</sub> (PA) |
|--------|------------|----|-----------|-------|------|-------------|------|-------------------|--------------------|-------|-----|-------|-------|------------------|-------------------|------------------|------------------|-----------------------|
| 020108 | Zn         | 11 | 15.74     | 12.96 | 0.82 | 10.91       | 6.13 | 3.68              | 38.02              | 0.005 | No  | 0.82  | -1.18 | 0.35             | Yes               | 0.16             | -1.18            | 258                   |
| 020108 | LiPrim     | 4  | 2.14      | 1.95  | 0.91 | 1.46        | 0.69 | 0.68              | 4.74               | 0.121 | Yes | 0.65  | -1.74 | 0.745            | Yes               | 0.24             | -1.87            | 318                   |
| 020206 | Zn         | 6  | 5.73      | 6.46  | 1.13 | 3.06        | 1.41 | 1.98              | 17.02              | 0.002 | No  | 1.26  | -0.26 | 0.145            | Yes               | 0.89             | -0.9             | 491                   |
| 020206 | LiPrim     | 5  | 0.41      | 0.51  | 1.24 | 0.2         | 0.05 | 0.15              | 1.22               | 0.001 | No  | 1.06  | -0.93 | 0.019            | No                | 0.98             | -1.03            | 591                   |
| 020402 | Pb         | 5  | 49.35     | 8.24  | 0.17 | 49.35       | 2.78 | 38.64             | 59.72              | 0.794 | Yes | -0.06 | -1.46 | 0.702            | Yes               | -0.28            | -1.43            | 11                    |
| 020402 | NiMH       | 12 | 22.38     | 10.42 | 0.47 | 18.61       | 8.29 | 11.32             | 41.29              | 0.131 | Yes | 0.7   | -0.84 | 0.56             | Yes               | 0.24             | -1.45            | 85                    |
| 020502 | NiCd       | 6  | 11.09     | 1.88  | 0.17 | 10.64       | 1.87 | 8.64              | 13.29              | 0.34  | Yes | 0.01  | -1.7  | 0.371            | Yes               | -0.16            | -1.56            | 11                    |
| 020502 | NiMH       | 12 | 15.91     | 5.98  | 0.38 | 15.55       | 6.16 | 7.47              | 24.17              | 0.378 | Yes | 0.08  | -1.49 | 0.342            | Yes               | -0.35            | -1.27            | 55                    |
| 020506 | NiCd       | 5  | 26.25     | 11.72 | 0.45 | 25.3        | 8.44 | 10.74             | 40.46              | 0.871 | Yes | -0.16 | -1.53 | 0.293            | Yes               | -0.69            | -1.28            | 78                    |
| 020506 | NiMH       | 17 | 19.53     | 5.64  | 0.29 | 19.05       | 2.3  | 12.09             | 31.71              | 0.054 | Yes | 0.89  | 0.43  | 0.298            | Yes               | 0.2              | -0.39            | 32                    |
| 020506 | LiRecharge | 4  | 19.17     | 6.28  | 0.33 | 19.24       | 7.95 | 13.6              | 24.61              | 0.032 | No  | 0     | -2.44 | 0.035            | No                | 0                | -2.44            | 42                    |
| 030101 | Zn         | 6  | 18.14     | 9.17  | 0.51 | 15.96       | 2.12 | 9.68              | 33.55              | 0.042 | No  | 1.02  | -0.51 | 0.364            | Yes               | 0.42             | -0.91            | 100                   |
| 030102 | Zn         | 12 | 8.27      | 12.55 | 1.52 | 5.02        | 3.5  | 2.21              | 37.19              | 0     | No  | 2.47  | 4.84  | 0.026            | No                | 1.23             | 0.91             | 888                   |

| subKey | BATTkey     | n   | $\bar{x}$ | SD    | VC   | $\tilde{x}$ | MAD   | 2.5 <sup>th</sup> | 97.5 <sup>th</sup> | p     | ND  | S     | K     | p <sub>log</sub> | ND <sub>log</sub> | S <sub>log</sub> | K <sub>log</sub> | n <sub>min</sub> (PA) |
|--------|-------------|-----|-----------|-------|------|-------------|-------|-------------------|--------------------|-------|-----|-------|-------|------------------|-------------------|------------------|------------------|-----------------------|
| 030108 | Zn          | 10  | 8.07      | 7.95  | 0.99 | 5           | 4.7   | 1.46              | 24.41              | 0.015 | No  | 1.28  | 0.49  | 0.96             | Yes               | 0.11             | -1.23            | 377                   |
| 030108 | LiPrim      | 5   | 4.19      | 3.65  | 0.87 | 3.67        | 2.91  | 1.45              | 9.75               | 0.066 | Yes | 0.85  | -1.18 | 0.533            | Yes               | 0.33             | -1.71            | 291                   |
| 030108 | unspecified | 4   | 2.54      | 2     | 0.79 | 2.17        | 1.85  | 0.85              | 4.88               | 0.355 | Yes | 0.21  | -2.2  | 0.318            | Yes               | 0.05             | -2.35            | 240                   |
| 030109 | LiPrim      | 4   | 4.77      | 1.97  | 0.41 | 4.8         | 2.46  | 2.87              | 6.63               | 0.181 | Yes | -0.01 | -2.4  | 0.21             | Yes               | -0.04            | -2.38            | 65                    |
| 030201 | LiPrim      | 116 | 0.04      | 0.02  | 0.63 | 0.03        | 0.01  | 0.02              | 0.09               | 0     | No  | 5.33  | 38.9  | 0                | No                | 1.51             | 4.38             | 152                   |
| 030301 | LiPrim      | 8   | 0.11      | 0.02  | 0.22 | 0.11        | 0.02  | 0.08              | 0.15               | 0.919 | Yes | 0.25  | -0.94 | 0.944            | Yes               | -0.16            | -1               | 19                    |
| 030301 | LiRecharge  | 17  | 12.39     | 4.51  | 0.36 | 13.12       | 1.57  | 0.9               | 17.15              | 0     | No  | -1.71 | 2.03  | 0                | No                | -2.98            | 8.01             | 50                    |
| 030502 | Zn          | 5   | 11.76     | 12.91 | 1.1  | 6.08        | 4.81  | 2.84              | 31.49              | 0.068 | Yes | 0.8   | -1.3  | 0.416            | Yes               | 0.32             | -1.9             | 465                   |
| 030502 | NiMH        | 33  | 13.16     | 7.9   | 0.6  | 9.46        | 3.7   | 3.86              | 29.7               | 0     | No  | 1.04  | -0.08 | 0.111            | Yes               | 0.19             | -0.69            | 138                   |
| 030502 | LiRecharge  | 4   | 29.26     | 6.9   | 0.24 | 27.16       | 3.39  | 23.71             | 38.39              | 0.272 | Yes | 0.58  | -1.78 | 0.448            | Yes               | 0.51             | -1.82            | 22                    |
| 030503 | Zn          | 5   | 13.87     | 7.16  | 0.52 | 10.39       | 1.15  | 9.64              | 25.1               | 0.008 | No  | 0.99  | -1.04 | 0.035            | No                | 0.89             | -1.18            | 104                   |
| 030601 | NiMH        | 24  | 30.57     | 12.38 | 0.4  | 32.88       | 16.73 | 10.07             | 46.38              | 0.069 | Yes | -0.36 | -0.69 | 0                | No                | -3.61            | 13.34            | 61                    |
| 030601 | LiRecharge  | 67  | 23.53     | 6.91  | 0.29 | 22.85       | 4.42  | 14.46             | 45.64              | 0     | No  | 1.62  | 3.71  | 0.002            | No                | 0.21             | 2.08             | 32                    |
| 040104 | Zn          | 105 | 19.11     | 9.75  | 0.51 | 17.43       | 9.04  | 7.01              | 41.7               | 0     | No  | 0.89  | 0.35  | 0.012            | No                | -0.5             | 1.06             | 100                   |
| 040104 | LiPrim      | 6   | 8.5       | 5.26  | 0.62 | 6.75        | 4.31  | 3.83              | 14.98              | 0.071 | Yes | 0.33  | -2.02 | 0.14             | Yes               | 0.15             | -2.08            | 148                   |
| 040104 | NiMH        | 4   | 21.48     | 11.56 | 0.54 | 20.78       | 10.21 | 8.97              | 35.17              | 0.841 | Yes | 0.13  | -1.88 | 0.666            | Yes               | -0.33            | -1.85            | 112                   |
| 040202 | Zn          | 15  | 16.06     | 13.25 | 0.82 | 11.38       | 10.12 | 2.71              | 45.51              | 0.005 | No  | 1.58  | 2.22  | 0.86             | Yes               | -0.22            | -0.59            | 258                   |
| 040205 | LiRecharge  | 7   | 13.61     | 3.27  | 0.24 | 13          | 2.97  | 9.27              | 18.64              | 0.873 | Yes | 0.29  | -1.06 | 0.935            | Yes               | -0.12            | -1.11            | 22                    |
| 040601 | Zn          | 6   | 15.6      | 10.03 | 0.64 | 12.52       | 9.17  | 5.76              | 28.8               | 0.222 | Yes | 0.35  | -1.94 | 0.563            | Yes               | 0.04             | -1.93            | 157                   |
| 040601 | LiPrim      | 4   | 2.5       | 2.57  | 1.03 | 2.39        | 3.12  | 0.24              | 4.96               | 0.086 | Yes | 0.01  | -2.42 | 0.107            | Yes               | -0.02            | -2.41            | 408                   |
| 040601 | LiRecharge  | 6   | 10.31     | 5.95  | 0.58 | 7.75        | 3.49  | 5.1               | 18.45              | 0.1   | Yes | 0.46  | -1.92 | 0.279            | Yes               | 0.3              | -1.97            | 129                   |
| 050101 | Zn          | 8   | 47.29     | 15.16 | 0.32 | 46.52       | 12.76 | 26.22             | 69.64              | 0.781 | Yes | 0.16  | -1.31 | 0.73             | Yes               | -0.37            | -0.96            | 39                    |
| 050602 | Zn          | 4   | 23.55     | 9.12  | 0.39 | 21.01       | 5.32  | 15.94             | 35.48              | 0.398 | Yes | 0.53  | -1.83 | 0.737            | Yes               | 0.36             | -1.91            | 58                    |
| 060102 | NiCd        | 15  | 30.69     | 11.78 | 0.38 | 33.08       | 8.43  | 5.13              | 44.47              | 0.093 | Yes | -1.08 | 0.58  | 0                | No                | -2.92            | 7.47             | 55                    |
| 060109 | NiMH        | 5   | 12.73     | 4.06  | 0.32 | 12.5        | 1.85  | 7.34              | 17.69              | 0.641 | Yes | -0.16 | -1.44 | 0.33             | Yes               | -0.57            | -1.31            | 39                    |
| 070101 | Zn          | 33  | 17.47     | 14.76 | 0.84 | 15.43       | 10.71 | 2.37              | 45.67              | 0     | No  | 1.85  | 4.49  | 0.762            | Yes               | -0.25            | -0.48            | 271                   |
| 070102 | Zn          | 4   | 9.35      | 9.39  | 1    | 8.09        | 9.76  | 1.08              | 19.76              | 0.321 | Yes | 0.13  | -2.29 | 0.366            | Yes               | -0.05            | -2.33            | 384                   |
| 090102 | Zn          | 8   | 8.6       | 10.4  | 1.21 | 2.64        | 2.02  | 0.81              | 26.93              | 0.011 | No  | 0.88  | -1.07 | 0.46             | Yes               | 0.13             | -1.5             | 562                   |

| subKey | BATTkey | n  | $\bar{x}$ | SD   | VC   | $\tilde{x}$ | MAD | 2.5 <sup>th</sup> | 97.5 <sup>th</sup> | p | ND | S     | K     | p <sub>log</sub> | ND <sub>log</sub> | S <sub>log</sub> | K <sub>log</sub> | n <sub>min</sub> (PA) |
|--------|---------|----|-----------|------|------|-------------|-----|-------------------|--------------------|---|----|-------|-------|------------------|-------------------|------------------|------------------|-----------------------|
| 090102 | LiPrim  | 23 | 11.94     | 2.47 | 0.21 | 12.45       | 0   | 7.13              | 12.45              | 0 | No | -4.19 | 16.26 | 0                | No                | -4.19            | 16.26            | 17                    |

n: number of observations,  $\bar{x}$ : mean, SD: standard deviation, VC: coefficient of variation,  $\tilde{x}$ : median, MAD: median absolute deviation, 95% CI: confidence interval [2.5<sup>th</sup> quantile, 97.5<sup>th</sup> quantile], p: p-value of Shapiro-Wilk test (normally distributed if p>0.05), ND: normally distributed data Yes/No, S: skewness, K: kurtosis; log(subscripted): respective values after log-transformation.

### 7.3. Bootstrap Data on Battery Mass Share (BMS) for all Batteries (BATT)

**Table S12.** Descriptive statistics for battery mass share of batteries in WEEE differentiated in UNUkeys. The table comprises descriptive statistics, the results of the Shapiro-Wilk test on the normal distribution (ND) for original and log-transformed (log) data sets, and the results of for minimum samples sizes according to the parametric approach n<sub>min</sub>(PA).

| UNUkey | BATTkey | B    | $\bar{x}^*$ | SD*  | VC*  | $\tilde{x}^*$ | MAD* | 2.5 <sup>th</sup> * | 97.5 <sup>th</sup> * | p*    | ND* | S*    | K*    | n <sub>min</sub> (PA) |
|--------|---------|------|-------------|------|------|---------------|------|---------------------|----------------------|-------|-----|-------|-------|-----------------------|
| 0201   | BATT    | 5000 | 12.32       | 2.4  | 0.19 | 12.2          | 2.43 | 7.99                | 17.23                | 0     | No  | 0.29  | -0.02 | 14                    |
| 0202   | BATT    | 5000 | 4.47        | 1.62 | 0.36 | 4.38          | 1.7  | 1.66                | 7.92                 | 0     | No  | 0.41  | -0.01 | 50                    |
| 0204   | BATT    | 5000 | 26.28       | 2.58 | 0.1  | 26.22         | 2.64 | 21.26               | 31.38                | 0.111 | Yes | 0.06  | -0.11 | 4                     |
| 0205   | BATT    | 5000 | 18.74       | 1.11 | 0.06 | 18.71         | 1.09 | 16.66               | 21.04                | 0     | No  | 0.17  | 0.12  | 1                     |
| 0301   | BATT    | 5000 | 10.68       | 1.96 | 0.18 | 10.57         | 1.96 | 7.19                | 14.74                | 0     | No  | 0.35  | 0.05  | 12                    |
| 0302   | BATT    | 5000 | 0.04        | 0.01 | 0.17 | 0.04          | 0    | 0.03                | 0.06                 | 0     | No  | 0.91  | 1.38  | 11                    |
| 0303   | BATT    | 5000 | 8.74        | 1.41 | 0.16 | 8.74          | 1.42 | 6.01                | 11.4                 | 0.296 | Yes | -0.04 | -0.07 | 10                    |
| 0304   | BATT    | 5000 | 0.17        | 0.08 | 0.49 | 0.17          | 0.16 | 0.05                | 0.28                 | 0     | No  | -0.09 | -1.03 | 92                    |
| 0305   | BATT    | 5000 | 15.7        | 1.41 | 0.09 | 15.65         | 1.39 | 13.02               | 18.53                | 0.004 | No  | 0.11  | -0.02 | 3                     |
| 0306   | BATT    | 5000 | 25.4        | 0.94 | 0.04 | 25.38         | 0.93 | 23.56               | 27.25                | 0.141 | Yes | 0.07  | -0.02 | 1                     |
| 0308   | BATT    | 5000 | 0.04        | 0.01 | 0.2  | 0.04          | 0.01 | 0.03                | 0.06                 | 0     | No  | 0.42  | -0.46 | 15                    |
| 0309   | BATT    | 5000 | 2.77        | 1.3  | 0.47 | 3             | 1.48 | 1                   | 5                    | 0     | No  | 0.11  | -1.14 | 85                    |
| 0401   | BATT    | 5000 | 18.57       | 0.88 | 0.05 | 18.56         | 0.9  | 16.85               | 20.28                | 0.142 | Yes | 0.05  | -0.11 | 1                     |
| 0402   | BATT    | 5000 | 17.14       | 2.47 | 0.14 | 16.99         | 2.42 | 12.82               | 22.38                | 0     | No  | 0.37  | 0.13  | 8                     |
| 0403   | BATT    | 5000 | 19.54       | 8.53 | 0.44 | 19.25         | 7.93 | 5.46                | 37.82                | 0     | No  | 0.4   | 0.1   | 74                    |
| 0404   | BATT    | 5000 | 9.15        | 6.32 | 0.69 | 9.14          | 0    | 0.1                 | 18.18                | 0     | No  | 0     | -0.95 | 183                   |
| 0406   | BATT    | 5000 | 9.96        | 1.92 | 0.19 | 9.87          | 1.91 | 6.41                | 14.03                | 0     | No  | 0.25  | 0.06  | 14                    |
| 0407   | BATT    | 5000 | 0.86        | 0.59 | 0.68 | 0.84          | 1.23 | 0.01                | 1.67                 | 0     | No  | -0.03 | -1    | 178                   |



| UNUkey | BATTkey | B    | $\bar{x}^*$ | SD*   | VC*  | $\tilde{x}^*$ | MAD*  | 2.5 <sup>th</sup> * | 97.5 <sup>th</sup> * | p*    | ND* | S*    | K*    | n <sub>min</sub> (PA) |
|--------|---------|------|-------------|-------|------|---------------|-------|---------------------|----------------------|-------|-----|-------|-------|-----------------------|
| 0408   | BATT    | 5000 | 30.75       | 7.16  | 0.23 | 30.72         | 14.89 | 20.68               | 40.76                | 0     | No  | 0     | -1.03 | 20                    |
| 0501   | BATT    | 5000 | 33.66       | 5.16  | 0.15 | 33.53         | 5.14  | 23.58               | 43.81                | 0.2   | Yes | -0.01 | -0.06 | 9                     |
| 0506   | BATT    | 5000 | 24.91       | 3.92  | 0.16 | 24.8          | 4.05  | 17.65               | 32.72                | 0     | No  | 0.12  | -0.15 | 10                    |
| 0601   | BATT    | 5000 | 25.96       | 3.36  | 0.13 | 25.8          | 3.25  | 19.81               | 32.97                | 0     | No  | 0.26  | 0.13  | 6                     |
| 0602   | BATT    | 5000 | 27.53       | 15.66 | 0.57 | 27            | 20.76 | 2                   | 53                   | 0     | No  | 0.01  | -1.2  | 125                   |
| 0701   | BATT    | 5000 | 15.25       | 2.19  | 0.14 | 15.08         | 2.18  | 11.46               | 19.86                | 0     | No  | 0.42  | 0.18  | 8                     |
| 0702   | BATT    | 5000 | 18.94       | 3.75  | 0.2  | 19            | 5     | 12.02               | 25.98                | 0     | No  | -0.18 | -0.37 | 15                    |
| 0801   | BATT    | 5000 | 5.07        | 0.63  | 0.12 | 5.06          | 0.71  | 3.75                | 6.44                 | 0     | No  | 0.02  | -0.5  | 6                     |
| 0901   | BATT    | 5000 | 11.08       | 0.99  | 0.09 | 11.07         | 0.98  | 9.15                | 13.06                | 0.567 | Yes | 0.04  | 0.07  | 3                     |

B: number of bootstrap samples,  $\bar{x}$ : mean, SD: standard deviation, VC: coefficient of variation,  $\tilde{x}$ : median, MAD: median absolute deviation, 95% CI: confidence interval [2.5<sup>th</sup> quantile, 97.5<sup>th</sup> quantile], p: p-value of Shapiro-Wilk test (normally distributed if p>0.05), ND: normally distributed data Yes/No, S: skewness, K: kurtosis.

**Table S13.** Descriptive statistics for battery mass share of batteries in WEEE differentiated in subKeys. The table comprises descriptive statistics, the results of the Shapiro-Wilk test on the normal distribution (ND) for original and log-transformed (log) data sets, and the results of for minimum samples sizes according to the parametric approach n<sub>min</sub>(PA).

| subKey | BATTkey | B    | $\bar{x}^*$ | SD*  | VC*  | $\tilde{x}^*$ | MAD* | 2.5 <sup>th</sup> * | 97.5 <sup>th</sup> * | p*    | ND* | S*   | K*    | n <sub>min</sub> (PA) |
|--------|---------|------|-------------|------|------|---------------|------|---------------------|----------------------|-------|-----|------|-------|-----------------------|
| 020108 | BATT    | 5000 | 12.78       | 2.68 | 0.21 | 12.67         | 2.67 | 7.89                | 18.45                | 0     | No  | 0.26 | 0.08  | 17                    |
| 020402 | BATT    | 5000 | 26.84       | 2.86 | 0.11 | 26.74         | 2.88 | 21.53               | 32.67                | 0     | No  | 0.17 | -0.02 | 5                     |
| 020502 | BATT    | 5000 | 16.15       | 1.65 | 0.1  | 16.05         | 1.66 | 13.1                | 19.52                | 0     | No  | 0.26 | 0.1   | 4                     |
| 020506 | BATT    | 5000 | 20.75       | 1.43 | 0.07 | 20.71         | 1.44 | 18.08               | 23.69                | 0     | No  | 0.16 | 0.06  | 2                     |
| 030108 | BATT    | 5000 | 6.57        | 1.51 | 0.23 | 6.47          | 1.5  | 3.88                | 9.75                 | 0     | No  | 0.35 | 0.21  | 20                    |
| 030201 | BATT    | 5000 | 0.04        | 0.01 | 0.17 | 0.04          | 0    | 0.03                | 0.06                 | 0     | No  | 0.92 | 1.2   | 11                    |
| 030301 | BATT    | 5000 | 7.86        | 1.32 | 0.17 | 7.85          | 1.35 | 5.27                | 10.5                 | 0.763 | Yes | 0.02 | -0.04 | 11                    |
| 030502 | BATT    | 5000 | 15.81       | 1.61 | 0.1  | 15.75         | 1.6  | 12.82               | 19.02                | 0     | No  | 0.12 | -0.09 | 4                     |
| 030601 | BATT    | 5000 | 25.38       | 0.96 | 0.04 | 25.35         | 0.98 | 23.59               | 27.33                | 0     | No  | 0.13 | -0.01 | 1                     |
| 040104 | BATT    | 5000 | 18.67       | 0.89 | 0.05 | 18.66         | 0.87 | 17.02               | 20.47                | 0.035 | No  | 0.09 | -0.05 | 1                     |
| 040202 | BATT    | 5000 | 14.95       | 2.89 | 0.19 | 14.74         | 2.91 | 9.97                | 21.17                | 0     | No  | 0.44 | 0.28  | 14                    |
| 040601 | BATT    | 5000 | 10.54       | 1.97 | 0.19 | 10.47         | 1.96 | 6.87                | 14.58                | 0     | No  | 0.22 | 0.05  | 14                    |

| subKey | BATTkey | B    | $\bar{x}^*$ | SD*  | VC*  | $\tilde{x}^*$ | MAD* | 2.5 <sup>th</sup> * | 97.5 <sup>th</sup> * | p*    | ND* | S*    | K*    | n <sub>min</sub> (PA) |
|--------|---------|------|-------------|------|------|---------------|------|---------------------|----------------------|-------|-----|-------|-------|-----------------------|
| 060102 | BATT    | 5000 | 27.7        | 2.89 | 0.1  | 27.75         | 2.95 | 21.86               | 33.18                | 0.001 | No  | -0.11 | -0.12 | 4                     |
| 070101 | BATT    | 5000 | 16.4        | 2.44 | 0.15 | 16.3          | 2.46 | 12.07               | 21.44                | 0     | No  | 0.36  | 0.33  | 9                     |
| 090102 | BATT    | 5000 | 11.09       | 1    | 0.09 | 11.09         | 0.98 | 9.12                | 13.11                | 0.222 | Yes | 0.06  | 0.1   | 3                     |

B: number of bootstrap samples,  $\bar{x}$ : mean, SD: standard deviation, VC: coefficient of variation,  $\tilde{x}$ : median, MAD: median absolute deviation, 95% CI: confidence interval [2.5<sup>th</sup> quantile, 97.5<sup>th</sup> quantile], p: p-value of Shapiro-Wilk test (normally distributed if p>0.05), ND: normally distributed data Yes/No, S: skewness, K: kurtosis.

#### 7.4. Bootstrap Data on Battery Mass Share (BMS) for Batteries differentiated by BATTkey

**Table S14.** Descriptive statistics for battery mass share of batteries in WEEE differentiated in UNUkeys and BATTkeys. The table comprises descriptive statistics, the results of the Shapiro-Wilk test on the normal distribution (ND) for original and log-transformed (log) data sets, and the results of for minimum samples sizes according to the parametric approach n<sub>min</sub>(PA).

| UNUkey | BATTkey     | B    | $\bar{x}^*$ | SD*   | VC*  | $\tilde{x}^*$ | MAD*  | 2.5 <sup>th</sup> * | 97.5 <sup>th</sup> * | p*    | ND* | S*    | K*    | n <sub>min</sub> (PA) |
|--------|-------------|------|-------------|-------|------|---------------|-------|---------------------|----------------------|-------|-----|-------|-------|-----------------------|
| 0301   | Zn          | 5000 | 10.32       | 1.93  | 0.19 | 10.19         | 1.91  | 6.91                | 14.43                | 0     | No  | 0.37  | 0.13  | 14                    |
| 0301   | LiPrim      | 5000 | 4.21        | 0.85  | 0.2  | 4.15          | 0.85  | 2.72                | 6.04                 | 0     | No  | 0.42  | 0.18  | 15                    |
| 0301   | NiMH        | 5000 | 8.27        | 3.18  | 0.38 | 8.26          | 3.9   | 1.89                | 15.4                 | 0     | No  | 0.08  | -0.54 | 55                    |
| 0301   | LiRecharge  | 5000 | 33.31       | 10.16 | 0.31 | 33.45         | 17.79 | 19.34               | 58.5                 | 0     | No  | 0.38  | -0.53 | 37                    |
| 0301   | unspecified | 5000 | 2.09        | 0.8   | 0.38 | 2.09          | 0.86  | 0.65                | 3.83                 | 0     | No  | 0.28  | -0.23 | 55                    |
| 0302   | LiPrim      | 5000 | 0.04        | 0     | 0.11 | 0.04          | 0     | 0.03                | 0.04                 | 0     | No  | -1.37 | 0.08  | 5                     |
| 0306   | NiMH        | 5000 | 30.53       | 2.48  | 0.08 | 30.55         | 2.49  | 25.66               | 35.29                | 0.558 | Yes | -0.05 | 0.01  | 2                     |
| 0306   | LiRecharge  | 5000 | 23.62       | 0.82  | 0.03 | 23.59         | 0.82  | 22.14               | 25.33                | 0     | No  | 0.24  | 0.16  | 0                     |
| 0401   | Zn          | 5000 | 19.11       | 0.94  | 0.05 | 19.09         | 0.95  | 17.31               | 20.98                | 0.279 | Yes | 0.06  | -0.03 | 1                     |
| 0401   | LiPrim      | 5000 | 8.54        | 1.95  | 0.23 | 8.49          | 2     | 4.81                | 12.23                | 0     | No  | 0.18  | -0.3  | 20                    |
| 0401   | NiMH        | 5000 | 21.54       | 5.03  | 0.23 | 21.48         | 5.32  | 11.54               | 32.11                | 0     | No  | 0.13  | -0.24 | 20                    |
| 0401   | unspecified | 5000 | 18.16       | 2.9   | 0.16 | 18.19         | 4.23  | 13.08               | 25.02                | 0     | No  | 0.25  | -0.52 | 10                    |

B: number of bootstrap samples,  $\bar{x}$ : mean, SD: standard deviation, VC: coefficient of variation,  $\tilde{x}$ : median, MAD: median absolute deviation, 95% CI: confidence interval [2.5<sup>th</sup> quantile, 97.5<sup>th</sup> quantile], p: p-value of Shapiro-Wilk test (normally distributed if p>0.05), ND: normally distributed data Yes/No, S: skewness, K: kurtosis

94  
95  
96

**Table S15.** Descriptive statistics for battery mass share of batteries in WEEE differentiated in subKeys and BATTkeys. The table comprises descriptive statistics, the results of the Shapiro-Wilk test on the normal distribution (ND) for original and log-transformed (log) data sets, and the results of for minimum samples sizes according to the parametric approach  $n_{min}(PA)$ .

| subKey | BATTkey        | B    | $\bar{x}^*$ | SD*  | VC*  | $\tilde{x}^*$ | MAD* | 2.5 <sup>th</sup> * | 97.5 <sup>th</sup> * | p*    | ND* | S*    | K*    | $n_{min}(PA)$ |
|--------|----------------|------|-------------|------|------|---------------|------|---------------------|----------------------|-------|-----|-------|-------|---------------|
| 020506 | battNiMH       | 5000 | 19.54       | 1.3  | 0.07 | 19.52         | 1.3  | 17.06               | 22.2                 | 0     | No  | 0.14  | 0     | 2             |
| 030201 | battLiPrim     | 5000 | 0.04        | 0    | 0.11 | 0.04          | 0    | 0.03                | 0.04                 | 0     | No  | -1.45 | 0.3   | 5             |
| 030301 | battLiRecharge | 5000 | 12.38       | 1.06 | 0.09 | 12.46         | 1.07 | 10.11               | 14.19                | 0     | No  | -0.45 | 0.13  | 3             |
| 030502 | battNiMH       | 5000 | 13.19       | 1.35 | 0.1  | 13.18         | 1.36 | 10.65               | 16.02                | 0     | No  | 0.18  | -0.02 | 4             |
| 030601 | battNiMH       | 5000 | 30.56       | 2.45 | 0.08 | 30.62         | 2.42 | 25.67               | 35.22                | 0.005 | No  | -0.12 | 0.02  | 2             |
| 030601 | battLiRecharge | 5000 | 23.54       | 0.84 | 0.04 | 23.51         | 0.85 | 21.97               | 25.23                | 0     | No  | 0.14  | -0.08 | 1             |
| 040104 | battZn         | 5000 | 19.09       | 0.94 | 0.05 | 19.08         | 0.95 | 17.28               | 20.96                | 0.08  | Yes | 0.09  | -0.01 | 1             |
| 040202 | battZn         | 5000 | 16.07       | 3.35 | 0.21 | 15.84         | 3.36 | 10.27               | 23.39                | 0     | No  | 0.46  | 0.22  | 17            |
| 060102 | battNiCd       | 5000 | 30.78       | 2.96 | 0.1  | 30.96         | 2.99 | 24.6                | 36.01                | 0     | No  | -0.31 | 0     | 4             |
| 070101 | battZn         | 5000 | 17.47       | 2.55 | 0.15 | 17.31         | 2.52 | 12.9                | 22.68                | 0     | No  | 0.34  | 0.24  | 9             |
| 090102 | battLiPrim     | 5000 | 11.93       | 0.5  | 0.04 | 11.94         | 0.76 | 10.91               | 12.45                | 0     | No  | -0.91 | 0.62  | 1             |

97  
98

B: number of bootstrap samples,  $\bar{x}$ : mean, SD: standard deviation, VC: coefficient of variation,  $\tilde{x}$ : median, MAD: median absolute deviation, 95% CI: confidence interval [2.5<sup>th</sup> quantile, 97.5<sup>th</sup> quantile], p: p-value of Shapiro-Wilk test (normally distributed if  $p > 0.05$ ), ND: normally distributed data Yes/No, S: skewness, K: kurtosis

99

## 8. WEEE Classification

100  
101

**Table S16.** UNUkey classification and allocation to WEEE categories EU-10 (Annex I to the WEEE Directive 2012/19/EU) and EU-6 (Annex III to the WEEE Directive 2012/19/EU).

| UNU<br>key | WEEE category |      | Description                                                  |
|------------|---------------|------|--------------------------------------------------------------|
|            | EU-10         | EU-6 |                                                              |
| 0001       | 01            | 04   | Central Heating (household installed)                        |
| 0002       | 04            | 04   | Photovoltaic Panels (incl. inverters)                        |
| 0101       | 01            | 04   | Professional Heating & Ventilation (excl. cooling equipment) |
| 0102       | 01            | 04   | Dishwashers                                                  |
| 0103       | 01            | 04   | Kitchen (e.g., large furnaces, ovens, cooking equipment)     |

| UNU<br>key | WEEE category |      | Description                                                               |
|------------|---------------|------|---------------------------------------------------------------------------|
|            | EU-10         | EU-6 |                                                                           |
| 0104       | 01            | 04   | Washing Machines (incl. combined dryers)                                  |
| 0105       | 01            | 04   | Dryers (wash dryers, centrifuges)                                         |
| 0106       | 01            | 04   | Household Heating & Ventilation (e.g., hoods, ventilators, space heaters) |
| 0108       | 01            | 01   | Fridges (incl. combi-fridges)                                             |
| 0109       | 01            | 01   | Freezers                                                                  |
| 0111       | 01            | 01   | Air Conditioners (household installed and portable)                       |
| 0112       | 01            | 01   | Other Cooling (e.g., dehumidifiers, heat pump dryers)                     |
| 0113       | 01            | 01   | Professional Cooling (e.g., large air conditioners, cooling displays)     |
| 0114       | 01            | 05   | Microwaves (incl. combined, excl. grills)                                 |
| 0201       | 02            | 05   | Other Small Household (e.g., small ventilators, irons, clocks, adapters)  |
| 0202       | 02            | 05   | Food (e.g., toaster, grills, food processing, frying pans)                |
| 0203       | 02            | 05   | Hot Water (e.g., coffee, tea, water cookers)                              |
| 0204       | 02            | 05   | Vacuum Cleaners (excl. professional)                                      |
| 0205       | 02            | 05   | Personal Care (e.g., toothbrushes, hairdryers, razors)                    |
| 0301       | 03            | 06   | Small IT (e.g., routers, mice, keyboards, external drives & accessories)  |
| 0302       | 03            | 06   | Desktop PCs (excl. monitors, accessoires)                                 |
| 0303       | 03            | 02   | Laptops (incl. tablets)                                                   |
| 0304       | 03            | 06   | Printers (e.g. scanners, multi functionals, faxes)                        |
| 0305       | 03            | 06   | Telecom (e.g. (cordless) phones, answering machines)                      |
| 0306       | 03            | 06   | Mobile Phones (incl. smartphones, pagers)                                 |
| 0307       | 03            | 04   | Professional IT (e.g., servers, routers, data storage, copiers)           |
| 0308       | 03            | 02   | Cathode Ray Tube Monitors                                                 |
| 0309       | 03            | 02   | Flat Display Panel Monitors (LCD, LED)                                    |
| 0401       | 04            | 05   | Small Consumer Electronics (e.g. headphones, remote controls)             |
| 0402       | 04            | 05   | Portable Audio & Video (e.g. MP3, e-readers, car navigation)              |
| 0403       | 04            | 05   | Music Instruments, Radio, Hi-Fi (incl. audio sets)                        |
| 0404       | 04            | 05   | Video (e.g., video recorders, DVD, Blue Ray, set-top boxes)               |

| UNU<br>key | WEEE category |      | Description                                                                 |
|------------|---------------|------|-----------------------------------------------------------------------------|
|            | EU-10         | EU-6 |                                                                             |
| 0405       | 04            | 05   | Speakers                                                                    |
| 0406       | 04            | 05   | Cameras (e.g. camcorders, photo & digital still cameras)                    |
| 0407       | 04            | 02   | Cathode Ray Tube TVs                                                        |
| 0408       | 04            | 02   | Flat Display Panel TVs (LCD, LED, Plasma)                                   |
| 0501       | 05            | 05   | Lamps (e.g. pocket, Christmas, excl. LED & incandescent)                    |
| 0502       | 05            | 03   | Compact Fluorescent Lamps (incl. retrofit & non-retrofit)                   |
| 0503       | 05            | 03   | Straight Tube Fluorescent Lamps                                             |
| 0504       | 05            | 03   | Special Lamps (e.g. professional mercury, high- & low-pressure sodium)      |
| 0505       | 05            | 03   | LED Lamps (incl. retrofit LED lamps & household LED luminaires)             |
| 0506       | 05            | 05   | Household Luminaires (incl. household incandescent fittings)                |
| 0507       | 05            | 05   | Professional Luminaires (offices, public space, industry)                   |
| 0601       | 06            | 05   | Household Tools (e.g., drills, saws, high-pressure cleaners, lawnmowers)    |
| 0602       | 06            | 04   | Professional Tools (e.g., for welding, soldering, milling)                  |
| 0701       | 07            | 05   | Toys (e.g., car racing sets, electric trains, music toys, biking computers) |
| 0702       | 07            | 06   | Game Consoles                                                               |
| 0703       | 07            | 04   | Leisure (e.g. large exercise, sports equipment)                             |
| 0801       | 08            | 05   | Household Medical (e.g., thermometers, blood pressure meters)               |
| 0802       | 08            | 04   | Professional Medical (e.g. hospital, dentist, diagnostics)                  |
| 0901       | 09            | 05   | Household Monitoring & Control (alarm, heat, smoke, excl. screens)          |
| 0902       | 09            | 04   | Professional Monitoring & Control (e.g. laboratory, control panels)         |
| 1001       | 10            | 04   | Non-Cooled Dispensers (e.g., for vending, hot drinks, tickets, money)       |
| 1002       | 10            | 01   | Cooled Dispensers (e.g., for vending, cold drinks)                          |

**Table S17.** UNUkey and sub-key classification and description of product groups.

| UNUkey | Description                                                               | subKey | Description                                |
|--------|---------------------------------------------------------------------------|--------|--------------------------------------------|
| 0001   | Central Heating (household installed)                                     | 000101 | Central heating and combi-warm water (gas) |
| 0001   | Central Heating (household installed)                                     | 000102 | Boilers (electric)                         |
| 0001   | Central Heating (household installed)                                     | 000103 | Geysers (gas)                              |
| 0001   | Central Heating (household installed)                                     | 000104 | Other hot water (installations)            |
| 0002   | Photovoltaic Panels (incl. inverters)                                     | 000201 | PV panels (roof-mounted)                   |
| 0002   | Photovoltaic Panels (incl. inverters)                                     | 000202 | PV panels (other types)                    |
| 0002   | Photovoltaic Panels (incl. inverters)                                     | 000203 | Inverter (for PV panels)                   |
| 0101   | Professional Heating & Ventilation (excl. cooling equipment)              | 010101 | Small PROF heating (terraces, panels)      |
| 0101   | Professional Heating & Ventilation (excl. cooling equipment)              | 010102 | Large PROF heating (installations)         |
| 0101   | Professional Heating & Ventilation (excl. cooling equipment)              | 010103 | PROF Kitchen (non-cooled)                  |
| 0101   | Professional Heating & Ventilation (excl. cooling equipment)              | 010104 | Other house/office heating equipment       |
| 0102   | Dishwashers                                                               | 010201 | Dishwashers                                |
| 0102   | Dishwashers                                                               | 010202 | Professional dishwashers                   |
| 0103   | Kitchen (e.g., large furnaces, ovens, cooking equipment)                  | 010301 | Combi-ovens                                |
| 0103   | Kitchen (e.g., large furnaces, ovens, cooking equipment)                  | 010302 | Furnaces                                   |
| 0103   | Kitchen (e.g., large furnaces, ovens, cooking equipment)                  | 010303 | Ovens                                      |
| 0104   | Washing Machines (incl. combined dryers)                                  | 010401 | Washing machines                           |
| 0104   | Washing Machines (incl. combined dryers)                                  | 010402 | Washing machines + combi-dryers            |
| 0105   | Dryers (wash dryers, centrifuges)                                         | 010501 | Dryers                                     |
| 0105   | Dryers (wash dryers, centrifuges)                                         | 010502 | Centrifuges                                |
| 0106   | Household Heating & Ventilation (e.g., hoods, ventilators, space heaters) | 010601 | Hoods                                      |
| 0106   | Household Heating & Ventilation (e.g., hoods, ventilators, space heaters) | 010602 | HH room ventilation (fixed)                |
| 0106   | Household Heating & Ventilation (e.g., hoods, ventilators, space heaters) | 010603 | Room heaters (non-central)                 |
| 0108   | Fridges (incl. combi-fridges)                                             | 010801 | Fridges (excl. combi freezers)             |
| 0108   | Fridges (incl. combi-fridges)                                             | 010802 | Wine fridge                                |
| 0108   | Fridges (incl. combi-fridges)                                             | 010803 | Absorption fridge                          |
| 0108   | Fridges (incl. combi-fridges)                                             | 010804 | Combined Refrigerator-freezer              |
| 0109   | Freezers                                                                  | 010901 | Freezers                                   |

| UNUkey | Description                                                              | subKey | Description                                 |
|--------|--------------------------------------------------------------------------|--------|---------------------------------------------|
| 0109   | Freezers                                                                 | 011001 | Combi fridges and freezers                  |
| 0111   | Air Conditioners (household installed and portable)                      | 011101 | HH airconditioning (moveable, ex split sys) |
| 0111   | Air Conditioners (household installed and portable)                      | 011102 | HH airconditioning (fixed, split sys)       |
| 0111   | Air Conditioners (household installed and portable)                      | 011103 | Other airconditioning and dehumidifying     |
| 0112   | Other Cooling (e.g., dehumidifiers, heat pump dryers)                    | 011201 | HH Watercoolers                             |
| 0112   | Other Cooling (e.g., dehumidifiers, heat pump dryers)                    | 011202 | Ice(cube) makers                            |
| 0112   | Other Cooling (e.g., dehumidifiers, heat pump dryers)                    | 011203 | Heat-pump dryers                            |
| 0112   | Other Cooling (e.g., dehumidifiers, heat pump dryers)                    | 011204 | Heat-pump boilers                           |
| 0113   | Professional Cooling (e.g., large air conditioners, cooling displays)    | 011301 | PROF Watercoolers                           |
| 0113   | Professional Cooling (e.g., large air conditioners, cooling displays)    | 011302 | PROF Icemakers                              |
| 0113   | Professional Cooling (e.g., large air conditioners, cooling displays)    | 011303 | Cooling displays                            |
| 0113   | Professional Cooling (e.g., large air conditioners, cooling displays)    | 011304 | PROF Fridges and freezers                   |
| 0113   | Professional Cooling (e.g., large air conditioners, cooling displays)    | 011305 | PROF Kitchen C&F Other                      |
| 0114   | Microwaves (incl. combined, excl. grills)                                | 011401 | Combi-microwave                             |
| 0114   | Microwaves (incl. combined, excl. grills)                                | 011402 | Microwave (non-combi)                       |
| 0201   | Other Small Household (e.g., small ventilators, irons, clocks, adapters) | 020101 | Irons                                       |
| 0201   | Other Small Household (e.g., small ventilators, irons, clocks, adapters) | 020102 | Sewing                                      |
| 0201   | Other Small Household (e.g., small ventilators, irons, clocks, adapters) | 020103 | Other Clothing                              |
| 0201   | Other Small Household (e.g., small ventilators, irons, clocks, adapters) | 020104 | Ventilators (small moveable)                |
| 0201   | Other Small Household (e.g., small ventilators, irons, clocks, adapters) | 020105 | Other ventilation small, insect removal     |
| 0201   | Other Small Household (e.g., small ventilators, irons, clocks, adapters) | 020106 | Other ventilation small, odors              |
| 0201   | Other Small Household (e.g., small ventilators, irons, clocks, adapters) | 020107 | Sleeping                                    |
| 0201   | Other Small Household (e.g., small ventilators, irons, clocks, adapters) | 020108 | Clocks                                      |
| 0201   | Other Small Household (e.g., small ventilators, irons, clocks, adapters) | 020109 | Other SHA                                   |
| 0201   | Other Small Household (e.g., small ventilators, irons, clocks, adapters) | 020110 | External power supply and adapters          |
| 0202   | Food (e.g., toaster, grills, food processing, frying pans)               | 020201 | Cooking plates (excl. oven)                 |
| 0202   | Food (e.g., toaster, grills, food processing, frying pans)               | 020202 | Frying pans                                 |
| 0202   | Food (e.g., toaster, grills, food processing, frying pans)               | 020203 | Warming food (BBQ, toasters, etc.)          |

| UNUkey | Description                                                              | subKey | Description                                   |
|--------|--------------------------------------------------------------------------|--------|-----------------------------------------------|
| 0202   | Food (e.g., toaster, grills, food processing, frying pans)               | 020204 | Grills                                        |
| 0202   | Food (e.g., toaster, grills, food processing, frying pans)               | 020205 | Blending and mixing                           |
| 0202   | Food (e.g., toaster, grills, food processing, frying pans)               | 020206 | Other kitchen equip, incl elec. coolers       |
| 0203   | Hot Water (e.g., coffee, tea, water cookers)                             | 020301 | Coffeemaker                                   |
| 0203   | Hot Water (e.g., coffee, tea, water cookers)                             | 020302 | Espressomaker                                 |
| 0203   | Hot Water (e.g., coffee, tea, water cookers)                             | 020303 | Watercooker                                   |
| 0203   | Hot Water (e.g., coffee, tea, water cookers)                             | 020304 | Other hot water and steam                     |
| 0204   | Vacuum Cleaners (excl. professional)                                     | 020401 | HH Vacuum cleaners                            |
| 0204   | Vacuum Cleaners (excl. professional)                                     | 020402 | Other vacuum and carpet cleaners              |
| 0205   | Personal Care (e.g., toothbrushes, hairdryers, razors)                   | 020501 | Hairdryers                                    |
| 0205   | Personal Care (e.g., toothbrushes, hairdryers, razors)                   | 020502 | Shavers and trimmers                          |
| 0205   | Personal Care (e.g., toothbrushes, hairdryers, razors)                   | 020503 | Other hairstyling                             |
| 0205   | Personal Care (e.g., toothbrushes, hairdryers, razors)                   | 020504 | Foot, face, skin and other massage            |
| 0205   | Personal Care (e.g., toothbrushes, hairdryers, razors)                   | 020505 | Other equipment for facial beauty             |
| 0205   | Personal Care (e.g., toothbrushes, hairdryers, razors)                   | 020506 | Toothbrushes                                  |
| 0205   | Personal Care (e.g., toothbrushes, hairdryers, razors)                   | 020507 | Face scrubber                                 |
| 0205   | Personal Care (e.g., toothbrushes, hairdryers, razors)                   | 020508 | Other personal care                           |
| 0301   | Small IT (e.g., routers, mice, keyboards, external drives & accessories) | 030101 | Mouses                                        |
| 0301   | Small IT (e.g., routers, mice, keyboards, external drives & accessories) | 030102 | Keyboards                                     |
| 0301   | Small IT (e.g., routers, mice, keyboards, external drives & accessories) | 030103 | External optical drives                       |
| 0301   | Small IT (e.g., routers, mice, keyboards, external drives & accessories) | 030104 | External storage (drives)                     |
| 0301   | Small IT (e.g., routers, mice, keyboards, external drives & accessories) | 030105 | External storage (flash)                      |
| 0301   | Small IT (e.g., routers, mice, keyboards, external drives & accessories) | 030106 | Computer accessoires (speakers, modems, etc.) |
| 0301   | Small IT (e.g., routers, mice, keyboards, external drives & accessories) | 030107 | External power supply and adapters IT         |
| 0301   | Small IT (e.g., routers, mice, keyboards, external drives & accessories) | 030108 | (Pocket) calculators                          |
| 0301   | Small IT (e.g., routers, mice, keyboards, external drives & accessories) | 030109 | Other small IT (non PC access.)               |
| 0302   | Desktop PCs (excl. monitors, accessoires)                                | 030201 | Desktop personal computers                    |
| 0303   | Laptops (incl. tablets)                                                  | 030301 | Laptops                                       |



| UNUkey | Description                                                     | subKey | Description                                         |
|--------|-----------------------------------------------------------------|--------|-----------------------------------------------------|
| 0303   | Laptops (incl. tablets)                                         | 030302 | Tablets                                             |
| 0303   | Laptops (incl. tablets)                                         | 030303 | Notebooks                                           |
| 0303   | Laptops (incl. tablets)                                         | 030304 | Other laptops, palmtops                             |
| 0304   | Printers (e.g., scanners, multi functionals, faxes)             | 030401 | HH Multifunctionals (fax, print, scan, copy, etc.)  |
| 0304   | Printers (e.g., scanners, multi functionals, faxes)             | 030402 | Inkjet printers                                     |
| 0304   | Printers (e.g., scanners, multi functionals, faxes)             | 030403 | Laser printers                                      |
| 0304   | Printers (e.g., scanners, multi functionals, faxes)             | 030404 | Other printers (matrix, thermal)                    |
| 0304   | Printers (e.g., scanners, multi functionals, faxes)             | 030405 | Scanners                                            |
| 0304   | Printers (e.g., scanners, multi functionals, faxes)             | 030406 | Typewriters                                         |
| 0304   | Printers (e.g., scanners, multi functionals, faxes)             | 030407 | Faxes                                               |
| 0305   | Telecom (e.g., (cordless) phones, answering machines)           | 030501 | Cordless phones                                     |
| 0305   | Telecom (e.g., (cordless) phones, answering machines)           | 030502 | Telephones (fixed)                                  |
| 0305   | Telecom (e.g., (cordless) phones, answering machines)           | 030503 | Other HH telecom                                    |
| 0306   | Mobile Phones (incl. smartphones, pagers)                       | 030601 | Mobile phones                                       |
| 0306   | Mobile Phones (incl. smartphones, pagers)                       | 030602 | Smartphones                                         |
| 0306   | Mobile Phones (incl. smartphones, pagers)                       | 030603 | Other mobile phone devices (pagers)                 |
| 0307   | Professional IT (e.g., servers, routers, data storage, copiers) | 030701 | PROF Multifunctionals (fax, print, scan, copy, etc) |
| 0307   | Professional IT (e.g., servers, routers, data storage, copiers) | 030702 | Copiers                                             |
| 0307   | Professional IT (e.g., servers, routers, data storage, copiers) | 030703 | Plotters and blueprinting                           |
| 0307   | Professional IT (e.g., servers, routers, data storage, copiers) | 030704 | Servers and workstations                            |
| 0307   | Professional IT (e.g., servers, routers, data storage, copiers) | 030705 | Overhead projectors and beamers                     |
| 0307   | Professional IT (e.g., servers, routers, data storage, copiers) | 030706 | Other PROF and network equipment                    |
| 0308   | Cathode Ray Tube Monitors                                       | 030801 | CRT Monitors                                        |
| 0309   | Flat Display Panel Monitors (LCD, LED)                          | 030901 | LCD Monitors                                        |
| 0309   | Flat Display Panel Monitors (LCD, LED)                          | 030902 | LED Monitors                                        |
| 0309   | Flat Display Panel Monitors (LCD, LED)                          | 030903 | Small flat screens                                  |
| 0401   | Small Consumer Electronics (e.g., headphones, remote controls)  | 040101 | Headphones and headsets                             |
| 0401   | Small Consumer Electronics (e.g., headphones, remote controls)  | 040102 | Microphones                                         |

| UNUkey | Description                                                    | subKey | Description                              |
|--------|----------------------------------------------------------------|--------|------------------------------------------|
| 0401   | Small Consumer Electronics (e.g., headphones, remote controls) | 040103 | Adapters and power supply CE             |
| 0401   | Small Consumer Electronics (e.g., headphones, remote controls) | 040104 | Remote controls                          |
| 0401   | Small Consumer Electronics (e.g., headphones, remote controls) | 040105 | Other small CE                           |
| 0402   | Portable Audio & Video (e.g., MP3, e-readers, car navigation)  | 040201 | mp3 and mp4 players                      |
| 0402   | Portable Audio & Video (e.g., MP3, e-readers, car navigation)  | 040202 | radio and CD (portable)                  |
| 0402   | Portable Audio & Video (e.g., MP3, e-readers, car navigation)  | 040203 | radio alarm clock with CD                |
| 0402   | Portable Audio & Video (e.g., MP3, e-readers, car navigation)  | 040204 | speakers (portable)                      |
| 0402   | Portable Audio & Video (e.g., MP3, e-readers, car navigation)  | 040205 | Navigation systems (portable)            |
| 0402   | Portable Audio & Video (e.g., MP3, e-readers, car navigation)  | 040206 | E-readers                                |
| 0402   | Portable Audio & Video (e.g., MP3, e-readers, car navigation)  | 040207 | Other portable audio                     |
| 0403   | Music Instruments, Radio, Hi-Fi (incl. audio sets)             | 040301 | Receivers and amplifiers                 |
| 0403   | Music Instruments, Radio, Hi-Fi (incl. audio sets)             | 040302 | Mini-midi and micro sets                 |
| 0403   | Music Instruments, Radio, Hi-Fi (incl. audio sets)             | 040303 | Car stereo                               |
| 0403   | Music Instruments, Radio, Hi-Fi (incl. audio sets)             | 040304 | Other audio components                   |
| 0403   | Music Instruments, Radio, Hi-Fi (incl. audio sets)             | 040305 | Musical instruments, sound mixing boards |
| 0404   | Video (e.g., video recorders, DVD, Blue Ray, set-top boxes)    | 040401 | DVD players and recorders                |
| 0404   | Video (e.g., video recorders, DVD, Blue Ray, set-top boxes)    | 040402 | Blue-ray players and recorders           |
| 0404   | Video (e.g., video recorders, DVD, Blue Ray, set-top boxes)    | 040403 | VCR players and recorders                |
| 0404   | Video (e.g., video recorders, DVD, Blue Ray, set-top boxes)    | 040404 | Decoders and satellite receivers         |
| 0404   | Video (e.g., video recorders, DVD, Blue Ray, set-top boxes)    | 040405 | Video and antenna equipment              |
| 0404   | Video (e.g., video recorders, DVD, Blue Ray, set-top boxes)    | 040406 | PROF CE equipment                        |
| 0405   | Speakers                                                       | 040501 | Speakers (individual)                    |
| 0405   | Speakers                                                       | 040502 | Speakers (set)                           |
| 0406   | Cameras (e.g., camcorders, photo & digital still cameras)      | 040601 | Digital Still Camera (photo)             |
| 0406   | Cameras (e.g., camcorders, photo & digital still cameras)      | 040602 | Video Camera (incl. photo function)      |
| 0407   | Cathode Ray Tube TVs                                           | 040701 | CRT TV's (incl. combi DVD, VCR)          |
| 0408   | Flat Display Panel TVs (LCD, LED, Plasma)                      | 040801 | LCD TV's                                 |
| 0408   | Flat Display Panel TVs (LCD, LED, Plasma)                      | 040802 | LED TV's                                 |

| UNUkey | Description                                                              | subKey | Description                                     |
|--------|--------------------------------------------------------------------------|--------|-------------------------------------------------|
| 0408   | Flat Display Panel TVs (LCD, LED, Plasma)                                | 040803 | Plasma TV's                                     |
| 0501   | Lamps (e.g., pocket, Christmas, excl. LED & incandescent)                | 050101 | Pocket lamps                                    |
| 0501   | Lamps (e.g., pocket, Christmas, excl. LED & incandescent)                | 050102 | Christmas lights and light strings (non-LED)    |
| 0501   | Lamps (e.g., pocket, Christmas, excl. LED & incandescent)                | 050103 | Other lamps (insects, tanning)                  |
| 0501   | Lamps (e.g., pocket, Christmas, excl. LED & incandescent)                | 050104 | Electric lighting or visual signaling equipment |
| 0501   | Lamps (e.g., pocket, Christmas, excl. LED & incandescent)                | 050105 | Halogen lamps with fittings                     |
| 0502   | Compact Fluorescent Lamps (incl. retrofit & non-retrofit)                | 050201 | CFL lamps (integrated, HH)                      |
| 0502   | Compact Fluorescent Lamps (incl. retrofit & non-retrofit)                | 050202 | CFL lamps (non-integrated, PROF)                |
| 0503   | Straight Tube Fluorescent Lamps                                          | 050301 | Straight fluorescent HH                         |
| 0503   | Straight Tube Fluorescent Lamps                                          | 050302 | Straight fluorescent B2C                        |
| 0503   | Straight Tube Fluorescent Lamps                                          | 050303 | UV lamps (lamps only)                           |
| 0504   | Special Lamps (e.g., professional mercury, high- & low-pressure sodium)  | 050401 | High-pressure sodium                            |
| 0504   | Special Lamps (e.g., professional mercury, high- & low-pressure sodium)  | 050402 | Low-pressure sodium                             |
| 0504   | Special Lamps (e.g., professional mercury, high- & low-pressure sodium)  | 050403 | Metal halide lamps                              |
| 0504   | Special Lamps (e.g., professional mercury, high- & low-pressure sodium)  | 050404 | High-pressure mercury                           |
| 0505   | LED Lamps (incl. retrofit LED lamps & household LED luminaires)          | 050501 | Retrofit LED lamps                              |
| 0505   | LED Lamps (incl. retrofit LED lamps & household LED luminaires)          | 050502 | LED inc. luminaire HH                           |
| 0505   | LED Lamps (incl. retrofit LED lamps & household LED luminaires)          | 050503 | LED strings                                     |
| 0506   | Household Luminaires (incl. household incandescent fittings)             | 050601 | HH luminaires                                   |
| 0506   | Household Luminaires (incl. household incandescent fittings)             | 050602 | HH luminaires accessoires                       |
| 0507   | Professional Luminaires (offices, public space, industry)                | 050701 | PROF Luminaires                                 |
| 0507   | Professional Luminaires (offices, public space, industry)                | 050702 | PROF LED Luminaires                             |
| 0601   | Household Tools (e.g., drills, saws, high-pressure cleaners, lawnmowers) | 060101 | Sanders and grinders                            |
| 0601   | Household Tools (e.g., drills, saws, high-pressure cleaners, lawnmowers) | 060102 | Drills                                          |
| 0601   | Household Tools (e.g., drills, saws, high-pressure cleaners, lawnmowers) | 060103 | Saws                                            |
| 0601   | Household Tools (e.g., drills, saws, high-pressure cleaners, lawnmowers) | 060104 | Power supplies and adapters                     |
| 0601   | Household Tools (e.g., drills, saws, high-pressure cleaners, lawnmowers) | 060105 | Cleaning, spraying, liquids                     |
| 0601   | Household Tools (e.g., drills, saws, high-pressure cleaners, lawnmowers) | 060106 | Welding and soldering                           |

| UNUkey | Description                                                                 | subKey | Description                           |
|--------|-----------------------------------------------------------------------------|--------|---------------------------------------|
| 0601   | Household Tools (e.g., drills, saws, high-pressure cleaners, lawnmowers)    | 060107 | Other handheld tools                  |
| 0601   | Household Tools (e.g., drills, saws, high-pressure cleaners, lawnmowers)    | 060108 | Water filtering and pumps             |
| 0601   | Household Tools (e.g., drills, saws, high-pressure cleaners, lawnmowers)    | 060109 | Grass and hedges                      |
| 0602   | Professional Tools (e.g., for welding, soldering, milling)                  | 060201 | PROF paint, mixing fluids             |
| 0602   | Professional Tools (e.g., for welding, soldering, milling)                  | 060202 | PROF compressors                      |
| 0602   | Professional Tools (e.g., for welding, soldering, milling)                  | 060203 | PROF sanders and grinders             |
| 0602   | Professional Tools (e.g., for welding, soldering, milling)                  | 060204 | PROF saws                             |
| 0602   | Professional Tools (e.g., for welding, soldering, milling)                  | 060205 | PROF power and air supply             |
| 0602   | Professional Tools (e.g., for welding, soldering, milling)                  | 060206 | PROF cleaning                         |
| 0602   | Professional Tools (e.g., for welding, soldering, milling)                  | 060207 | PROF drills                           |
| 0602   | Professional Tools (e.g., for welding, soldering, milling)                  | 060208 | PROF Others                           |
| 0701   | Toys (e.g., car racing sets, electric trains, music toys, biking computers) | 070101 | Small toys                            |
| 0701   | Toys (e.g., car racing sets, electric trains, music toys, biking computers) | 070102 | Vehicle toys                          |
| 0701   | Toys (e.g., car racing sets, electric trains, music toys, biking computers) | 070103 | Small music toys                      |
| 0702   | Game Consoles                                                               | 070201 | Game consoles (TV, Monitor connected) |
| 0702   | Game Consoles                                                               | 070202 | Game consoles (portable)              |
| 0702   | Game Consoles                                                               | 070203 | Games consoles accessoires            |
| 0702   | Game Consoles                                                               | 070204 | Games (cards)                         |
| 0703   | Leisure (e.g., large exercise, sports equipment)                            | 070301 | Bicycle trainer                       |
| 0703   | Leisure (e.g., large exercise, sports equipment)                            | 070302 | Other exercise equipment              |
| 0703   | Leisure (e.g., large exercise, sports equipment)                            | 070303 | E-bikes                               |
| 0703   | Leisure (e.g., large exercise, sports equipment)                            | 070304 | Other Leisure                         |
| 0801   | Household Medical (e.g., thermometers, blood pressure meters)               | 080101 | Small Medical                         |
| 0802   | Professional Medical (e.g., hospital, dentist, diagnostics)                 | 080201 | Large Medical                         |
| 0901   | Household Monitoring & Control (alarm, heat, smoke, excl. screens)          | 090101 | Smoke detectors                       |
| 0901   | Household Monitoring & Control (alarm, heat, smoke, excl. screens)          | 090102 | Other small monitoring                |
| 0902   | Professional Monitoring & Control (e.g., laboratory, control panels)        | 090201 | PROF Monitoring                       |
| 1001   | Non-Cooled Dispensers (e.g., for vending, hot drinks, tickets, money)       | 100101 | PROF Dispensers non-cooled food       |

| UNUkey | Description                                        | subKey | Description                 |
|--------|----------------------------------------------------|--------|-----------------------------|
| 1002   | Cooled Dispensers (e.g., for vending, cold drinks) | 100201 | PROF Dispensers cooled food |

104

105
